# Supplementary material for: Investigation of the cytotoxic potential of methyl imidazole-derived thiosemicarbazones and their copper(ii) complexes with dichloroacetate as a co-ligand
Source: Royal Society of Chemistry journal article supplement (doi:10.1039/c8nj04041a), 2018-11-09
Supplement: c8nj04041a1.pdf [file c8nj04041a1.pdf]

**New Journal of Chemistry**  
**Electronic Supplementary Information**

**Investigation of the cytotoxic potential of methyl imidazole-derived  
thiosemicarbazones and their copper(II) complexes with dichloroacetate as  
co-ligand**

Oleg Palamarciuc, Miljan N. M. Milunovic,\* Angela Sîrbu, Elena Stratulat, Aurel Pui,  
Nevenka Gligorijevic, Sinisa Radulovic, Jozef Kožíšek, Denisa Darvasiová, Peter Rapta, Eva  
Anna Enyedy, Ghenadie Novitchi, Sergiu Shova, Vladimir B. Arion\*

*University of Vienna, Faculty of Chemistry, Institute of Inorganic Chemistry, Währinger Strasse 42, A-1090,  
Austria*

\*E-mail: [miljan.milunovic@univie.ac.at](mailto:miljan.milunovic@univie.ac.at); [vladimir.arion@univie.ac.at](mailto:vladimir.arion@univie.ac.at)

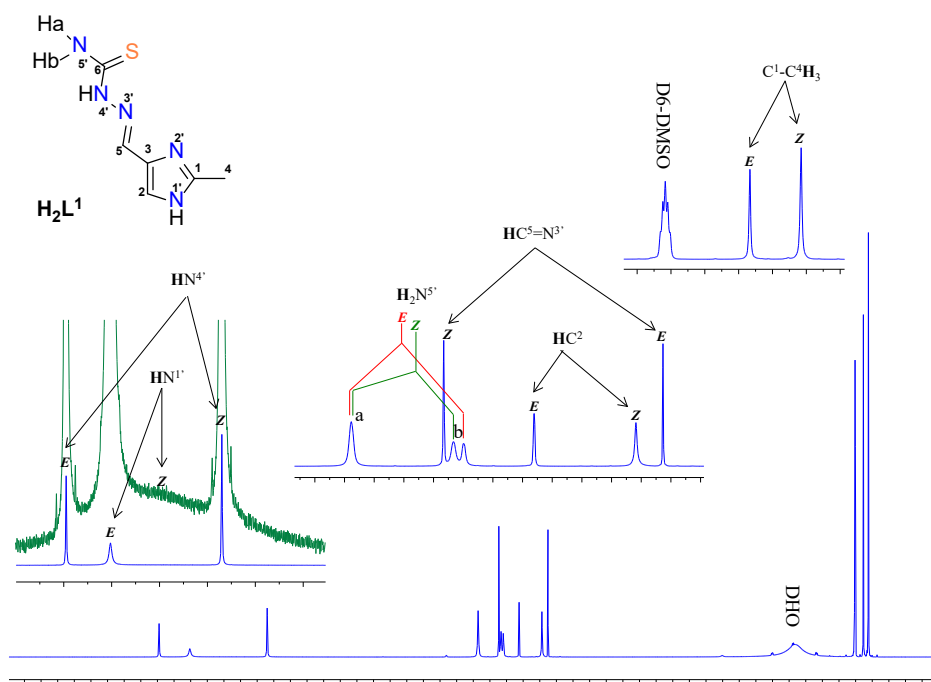

**Fig. S1a**  $^1\text{H}$  NMR (500 MHz) spectra of  $\text{HL}^1$  in  $\text{DMSO-d}_6$  (Z : E = 1.5 : 1)

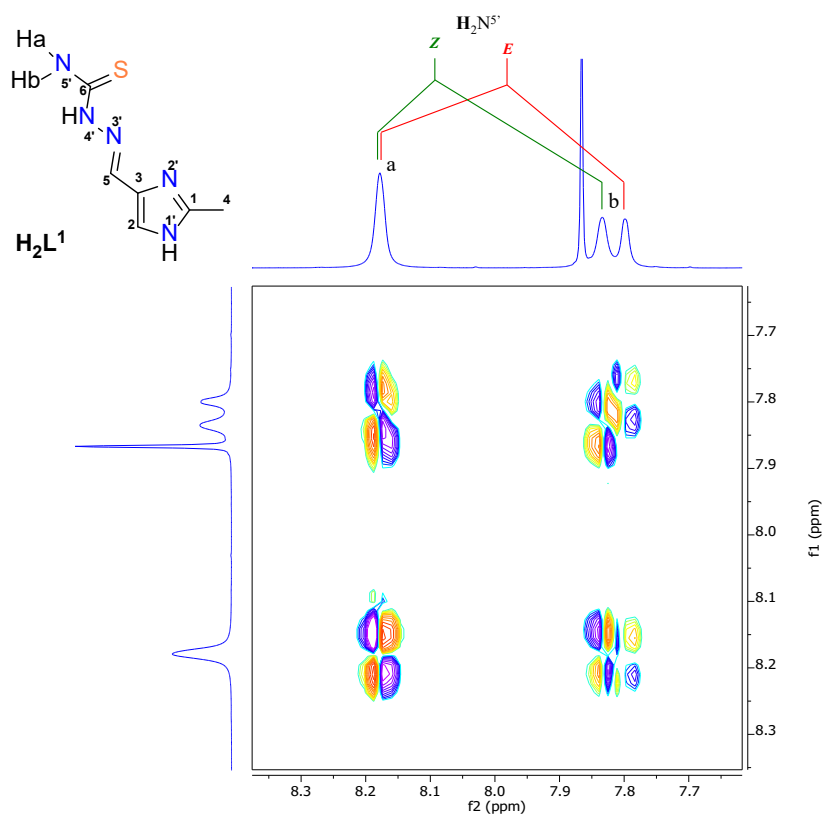

**Fig. S1b**  $^1\text{H}, ^1\text{H}$  COSY NMR spectrum of  $\text{HL}^1$  in  $\text{DMSO-d}_6$ .

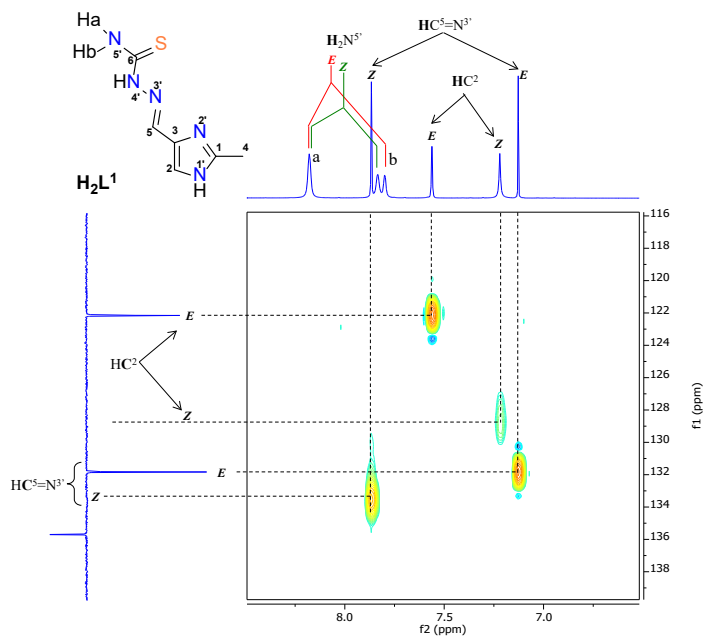

Fig. S1c  $^1\text{H}$ ,  $^{13}\text{C}$  HSQC NMR spectrum of **HL**<sup>1</sup> in DMSO- $d_6$ .

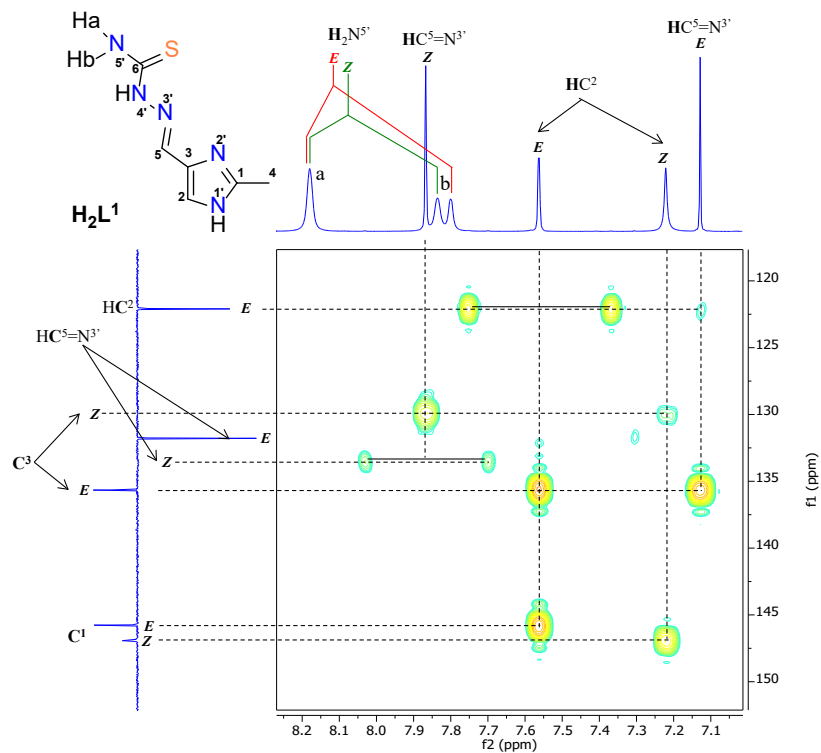

Fig. S1d Fragment of  $^1\text{H}$ ,  $^{13}\text{C}$  HMQC NMR spectrum of **HL**<sup>1</sup> in DMSO- $d_6$ .

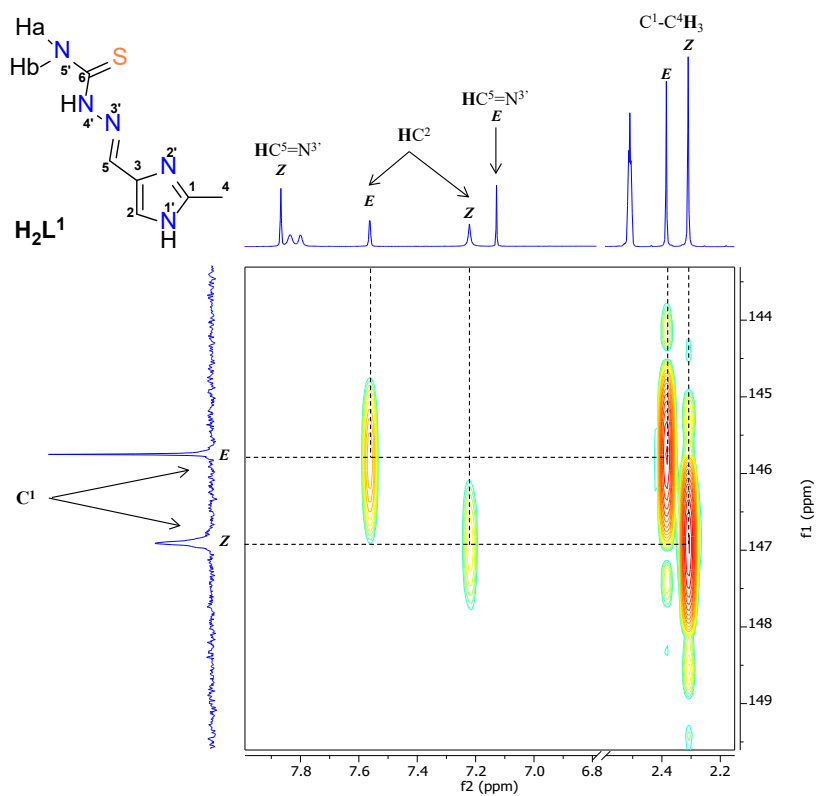

**Fig. S1e** Fragment of  $^1\text{H}$ ,  $^{13}\text{C}$  HMQC NMR spectrum of **HL<sup>1</sup>** in DMSO- $d_6$ .

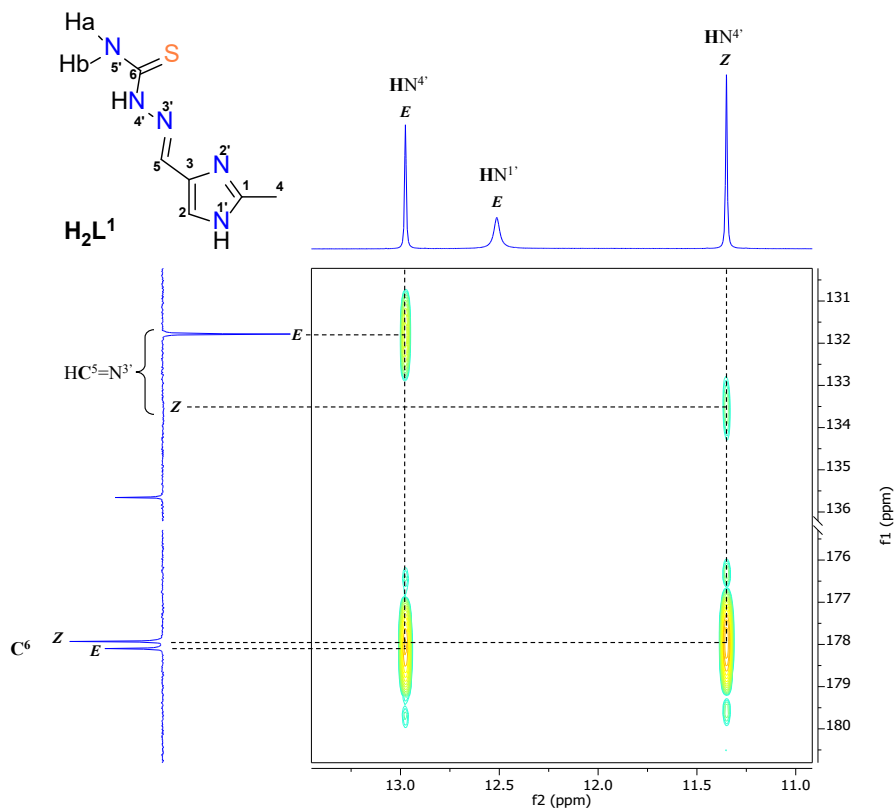

**Fig. S1f** Fragment of  $^1\text{H}$ ,  $^{13}\text{C}$  HMQC NMR spectrum of **HL<sup>1</sup>** in DMSO- $d_6$ .

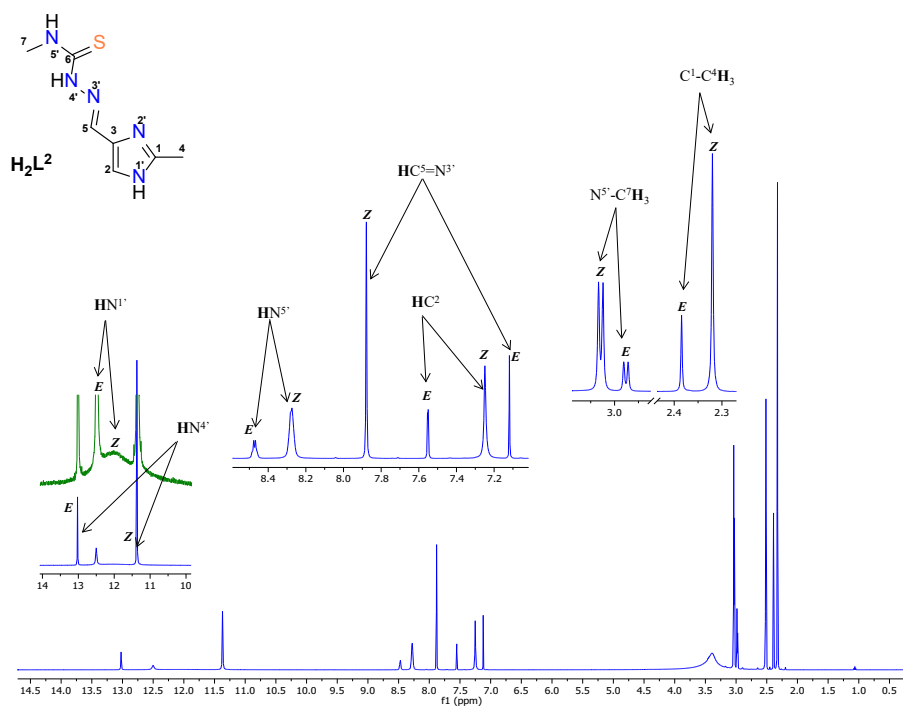

**Fig. S2a**  $^1\text{H}$  NMR (500 MHz) spectra of  $\text{HL}^2$  in  $\text{DMSO-d}_6$  (Z:E=3.9:1).

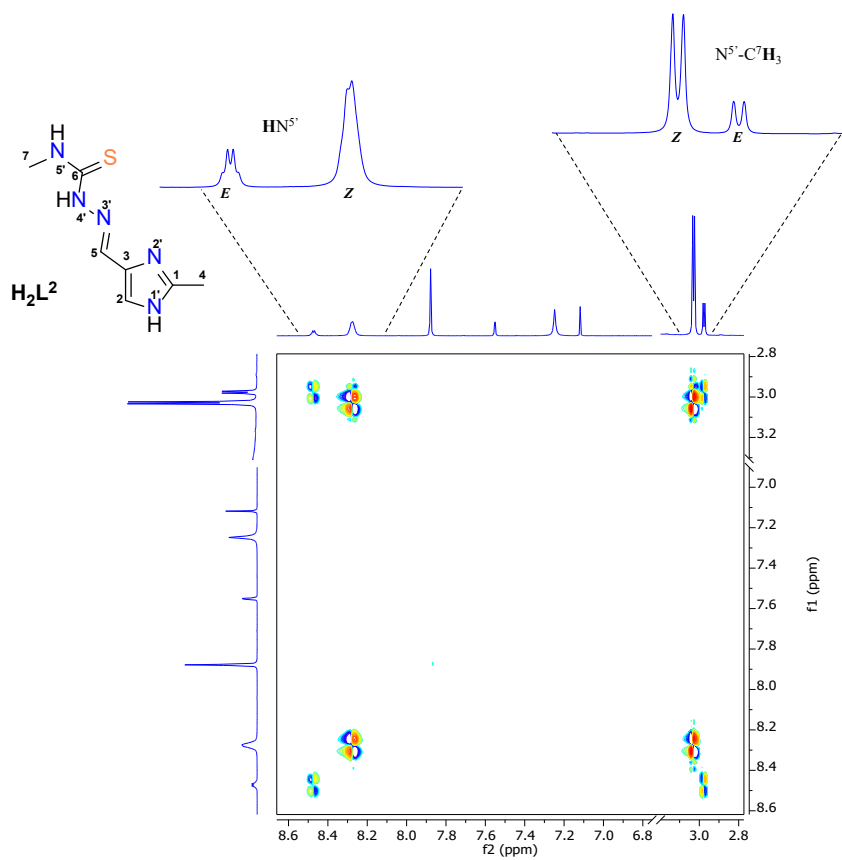

**Fig. S2b**  $^1\text{H}, ^1\text{H}$  COSY NMR spectrum of  $\text{HL}^2$  in  $\text{DMSO-d}_6$ .

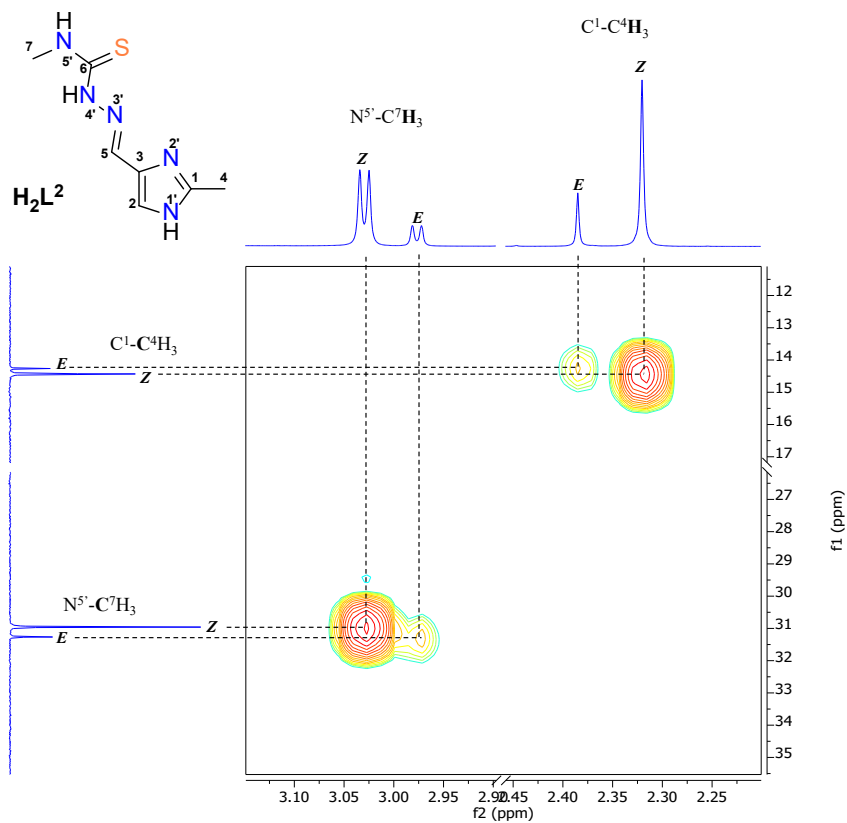

Fig. S2c Fragment of  $^1\text{H}$ ,  $^{13}\text{C}$  HSQC NMR spectrum of  $\text{HL}^2$  in  $\text{DMSO-d}_6$ .

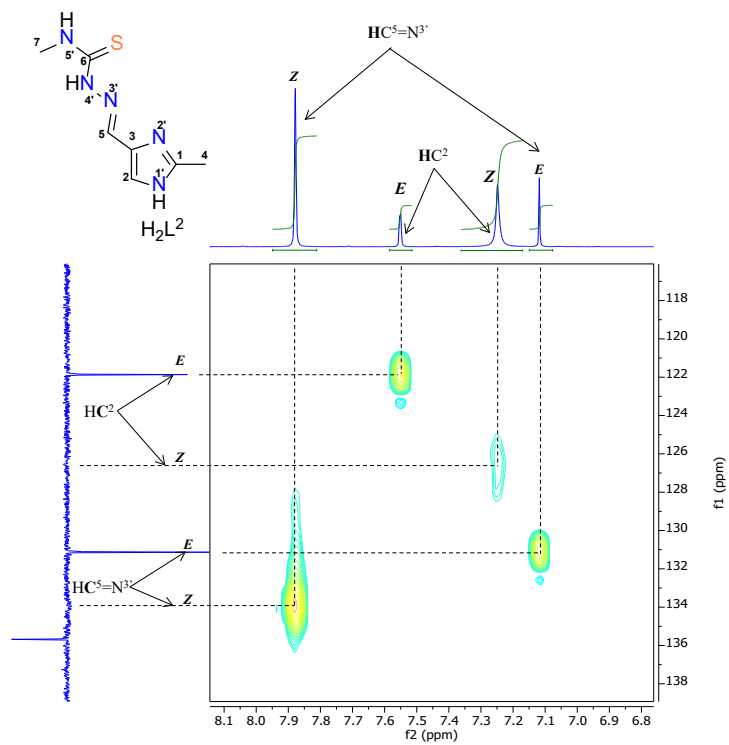

Fig. S2d. Fragment of  $^1\text{H}$ ,  $^{13}\text{C}$  HSQC NMR spectrum of  $\text{HL}^2$  in  $\text{DMSO-d}_6$ .

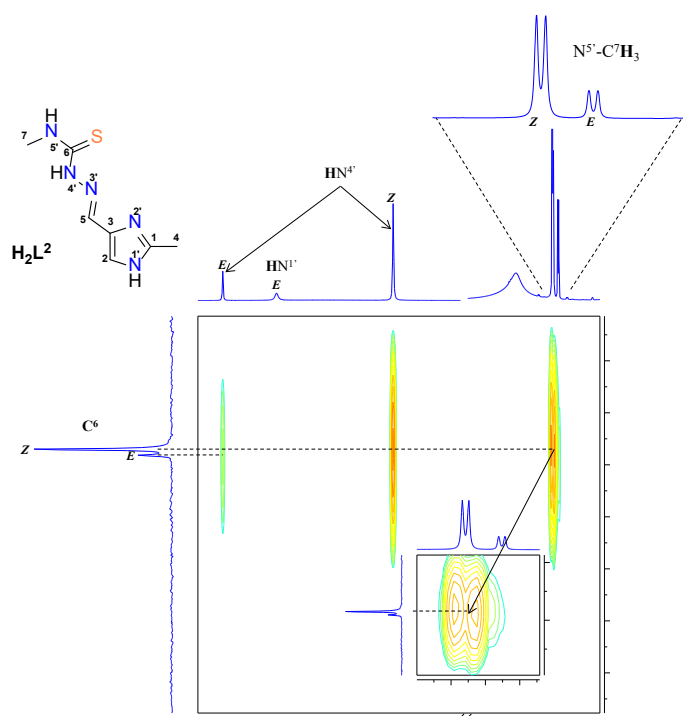

**Fig. S2e** Fragment of  $^1\text{H}$ ,  $^{13}\text{C}$  HMQC NMR spectrum of  $\text{HL}^2$  in  $\text{DMSO-d}_6$ .

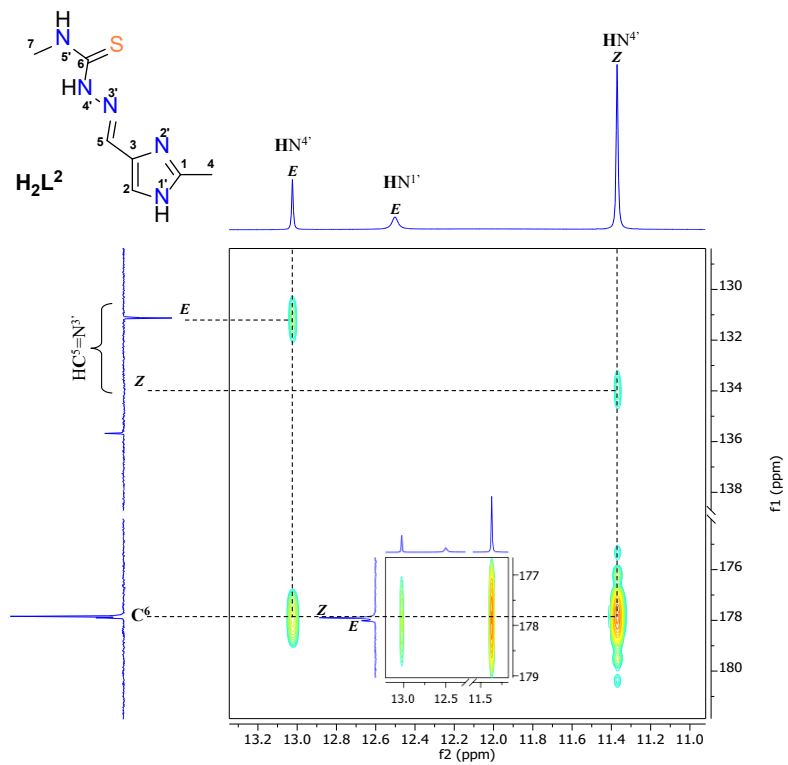

**Fig. S2f** Fragment of  $^1\text{H}$ ,  $^{13}\text{C}$  HMQC NMR spectrum of  $\text{HL}^2$  in  $\text{DMSO-d}_6$ .

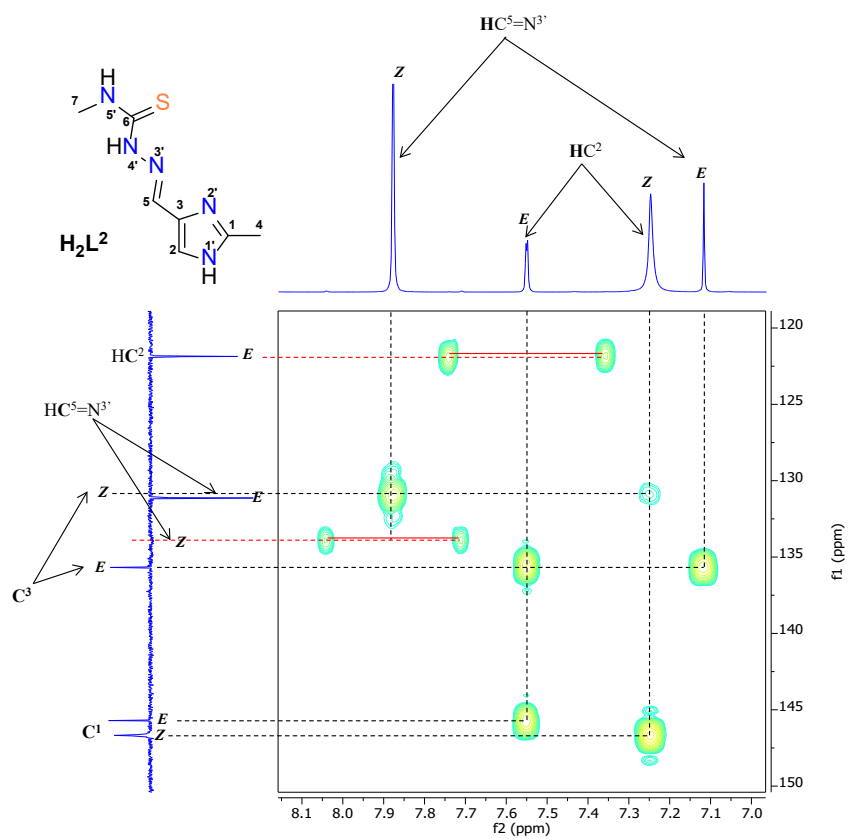

**Fig. S2g** Fragment of  $^1\text{H}$ ,  $^{13}\text{C}$  HMQC NMR spectrum of  $\text{HL}^2$  in  $\text{DMSO-d}_6$ .

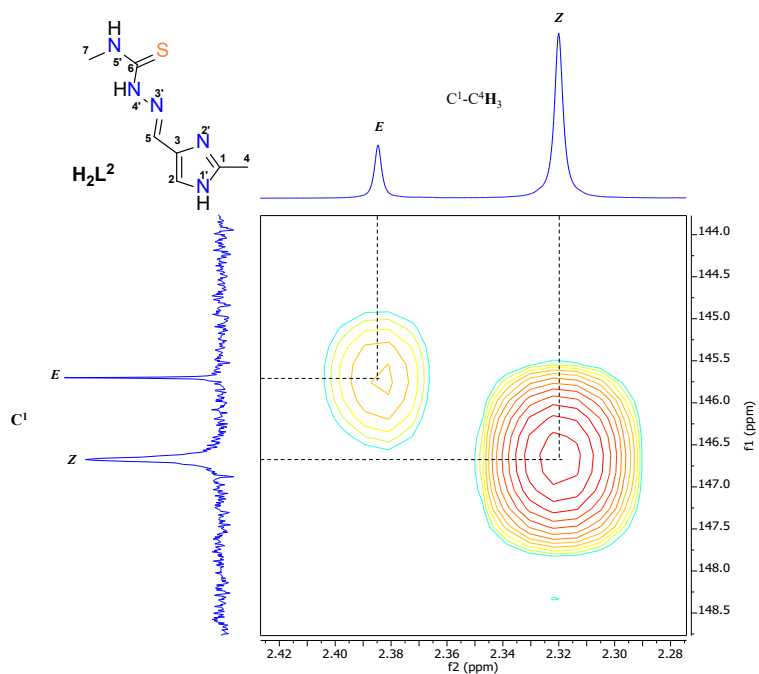

**Fig. S2h** Fragment of  $^1\text{H}$ ,  $^{13}\text{C}$  HMQC NMR spectrum of  $\text{HL}^2$  in  $\text{DMSO-d}_6$ .



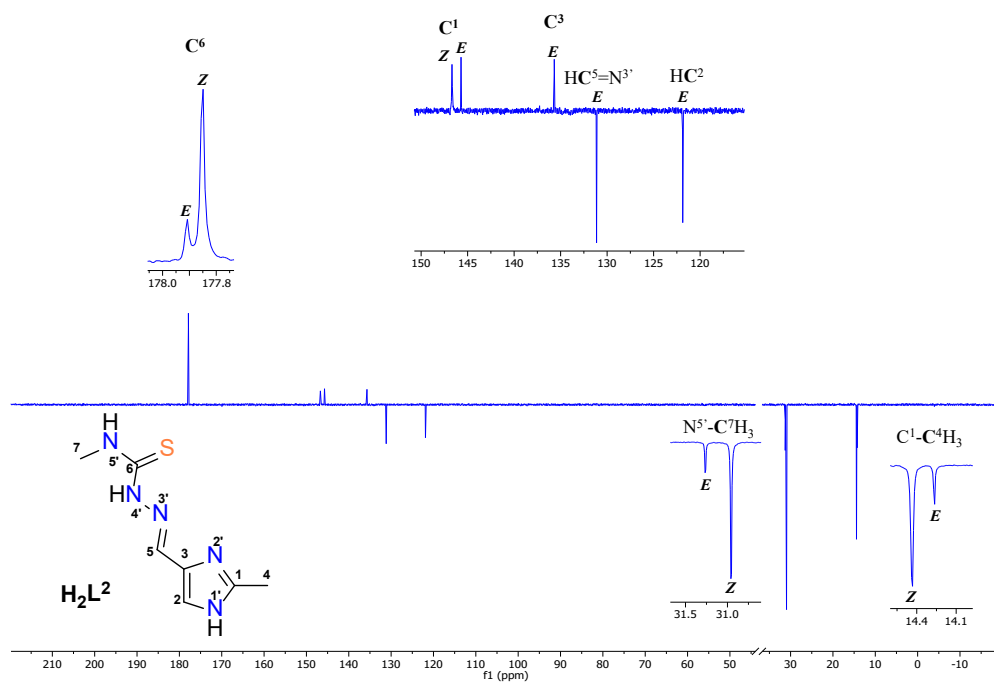

**Fig. S2i**  $^{13}\text{C}$  NMR spectra of  $\text{HL}^2$  in  $\text{DMSO-d}_6$

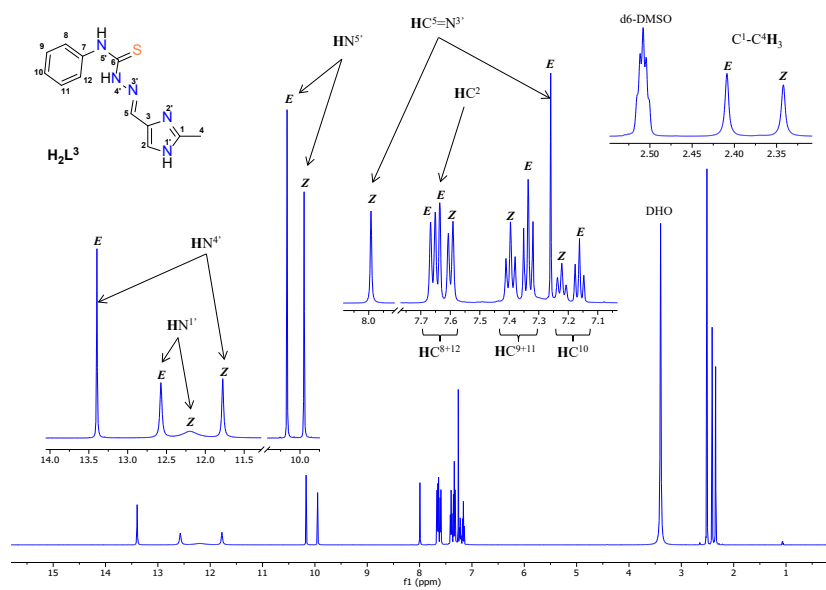

**Fig. S3a**  $^1\text{H}$  NMR (500 MHz) spectra of  $\text{HL}^3$  in  $\text{DMSO-d}_6$  (Z:E~0.8:1).

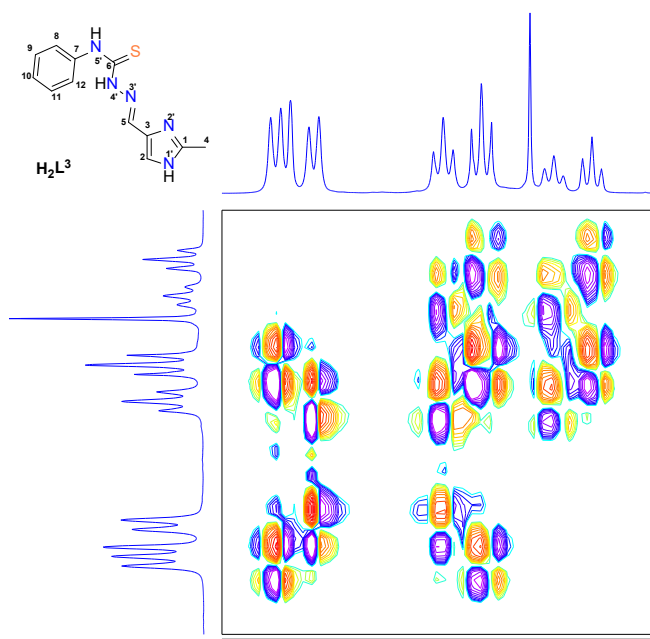

**Fig. S3b**  $^1\text{H}, ^1\text{H}$  COSY NMR spectrum of **HL<sup>3</sup>** in DMSO- $d_6$ .

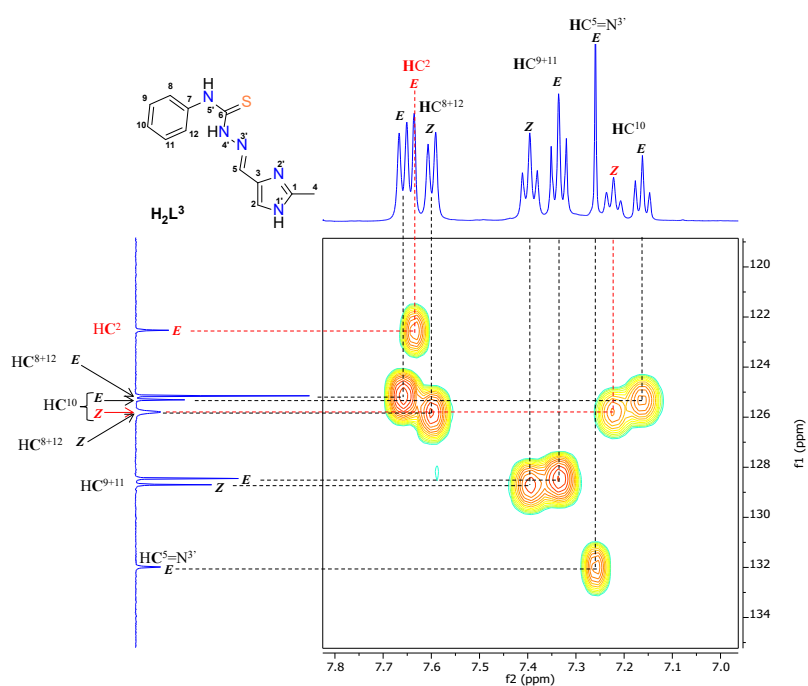

**Fig. S3c** Fragment of  $^1\text{H}, ^{13}\text{C}$  HSQC NMR spectrum of **HL<sup>3</sup>** in DMSO- $d_6$ .

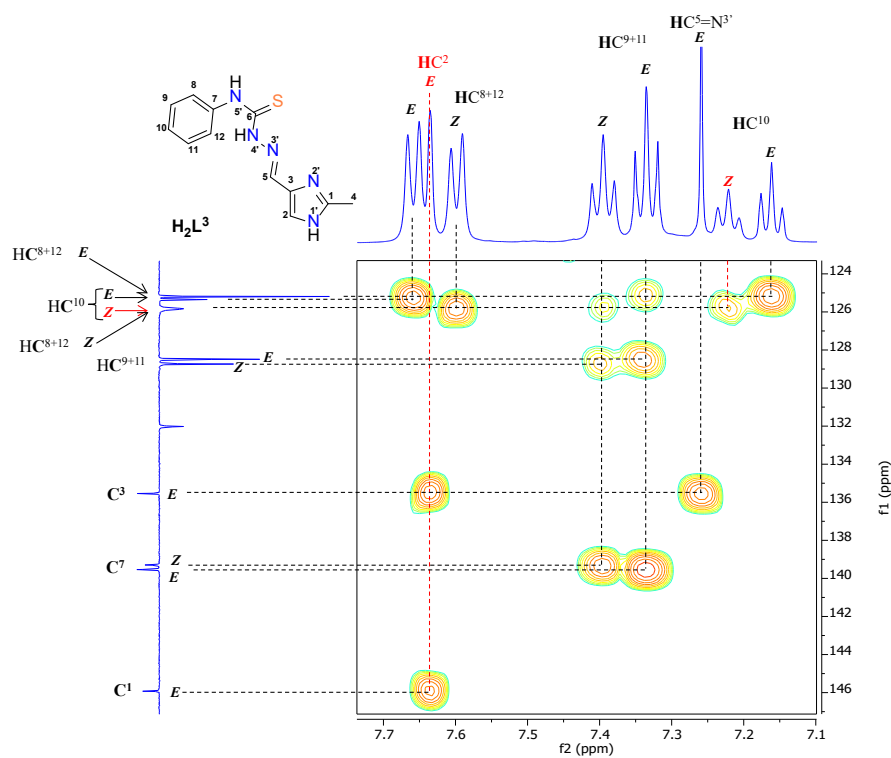

**Fig. S3d** Fragment of  $^1\text{H}$ ,  $^{13}\text{C}$  HMQC NMR spectrum of  $\text{HL}^3$  in  $\text{DMSO-d}_6$ .

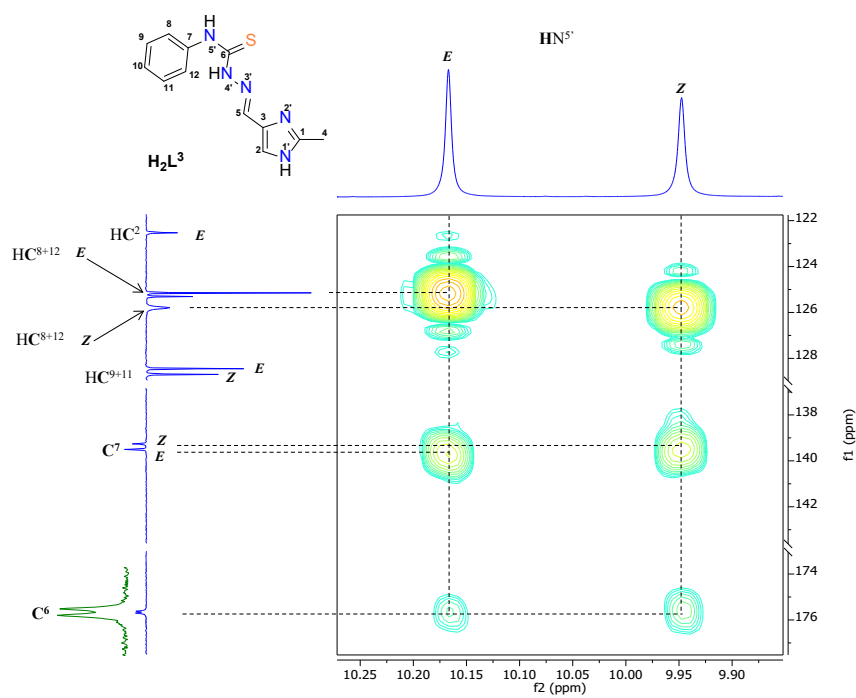

**Fig. S3e** Fragment of  $^1\text{H}$ ,  $^{13}\text{C}$  HMQC NMR spectrum of  $\text{HL}^3$  in  $\text{DMSO-d}_6$ .

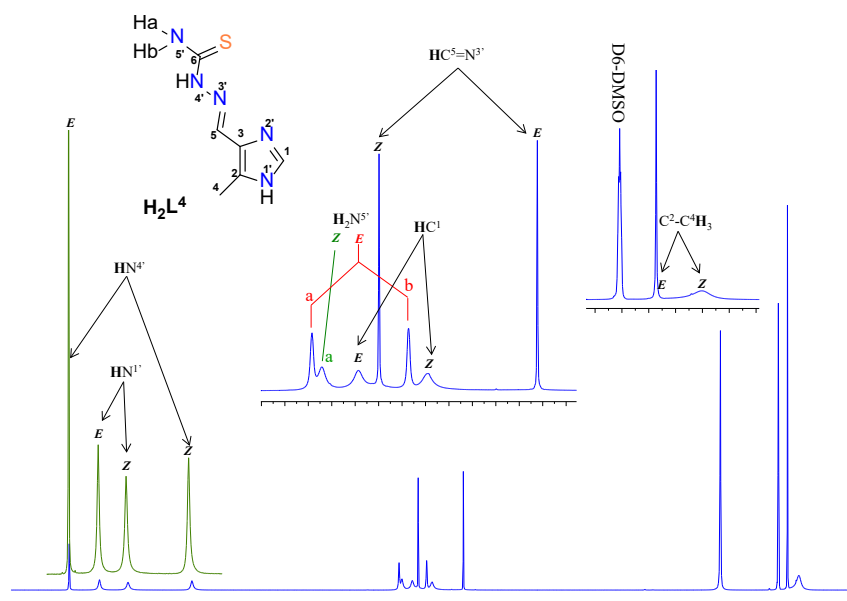

**Fig. S4a**  $^1\text{H}$  NMR (500 MHz) spectra of  $\text{HL}^4$  in  $\text{DMSO-d}_6$  (Z:E = 1:1).

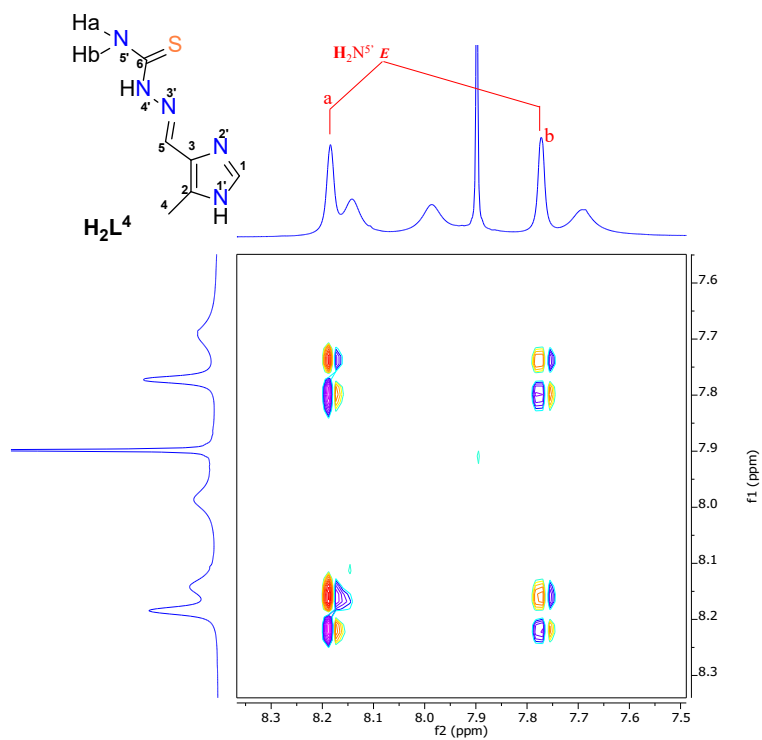

**Fig. S4b**  $^1\text{H}, ^1\text{H}$  COSY NMR spectrum of  $\text{HL}^4$  in  $\text{DMSO-d}_6$ .

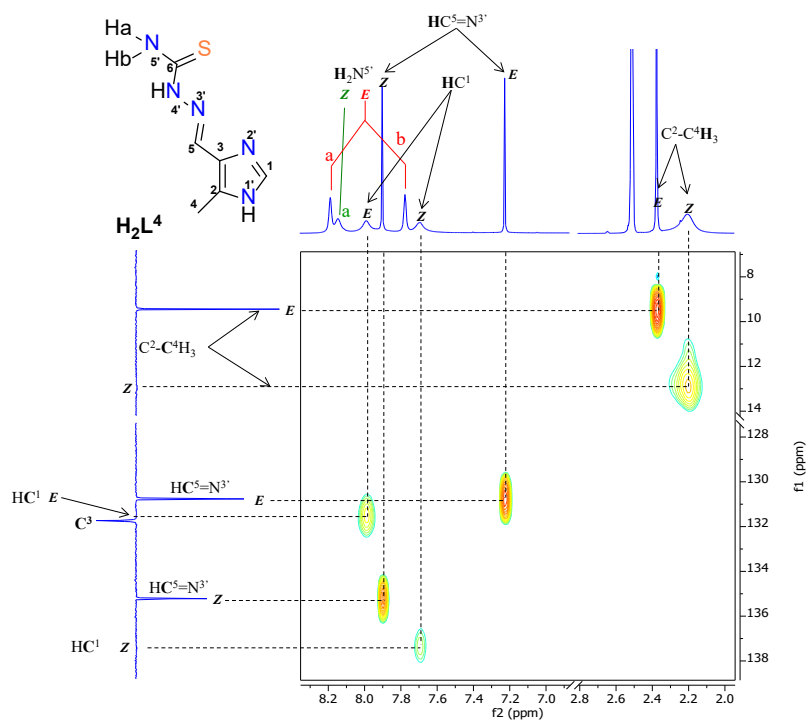

**Fig. S4c** <sup>1</sup>H, <sup>13</sup>C HSQC NMR spectrum of **HL<sup>4</sup>** in DMSO-d<sub>6</sub>.

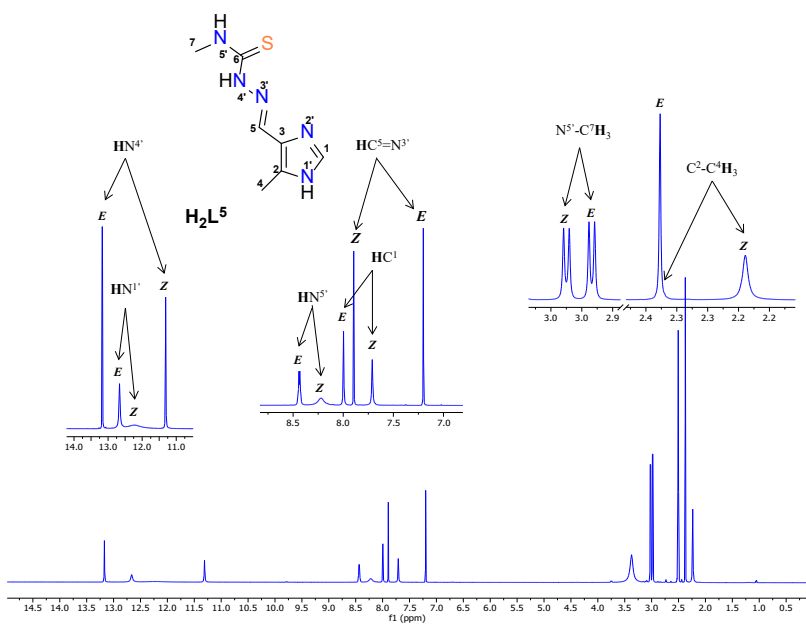

**Fig. S5a** <sup>1</sup>H NMR (500 MHz) spectra of **HL<sup>5</sup>** in DMSO-d<sub>6</sub> (Z:E=1:1).

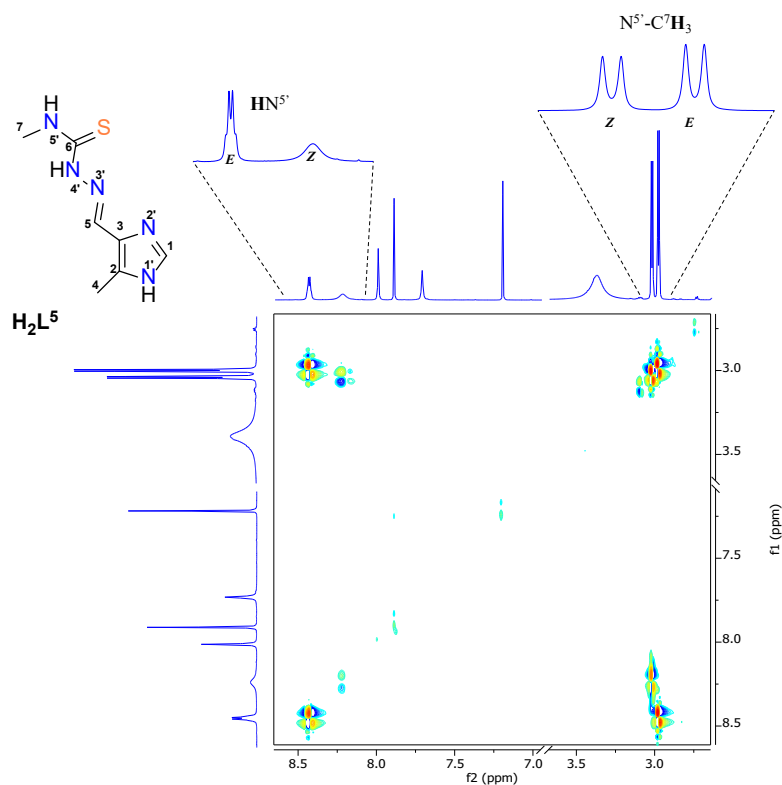

Fig. S5b  $^1\text{H}, ^1\text{H}$  COSY NMR spectrum of  $\text{HL}^5$  in  $\text{DMSO-d}_6$ .

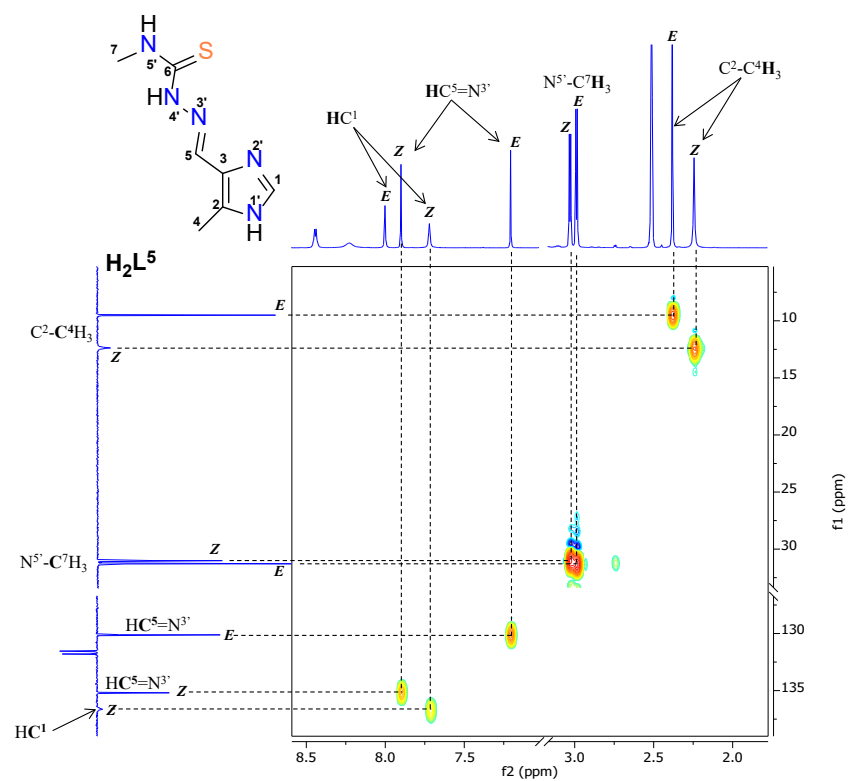

Fig. S5c  $^1\text{H}, ^{13}\text{C}$  HSQC NMR spectrum of  $\text{H}_2\text{L}^5$  in  $\text{DMSO-d}_6$ .

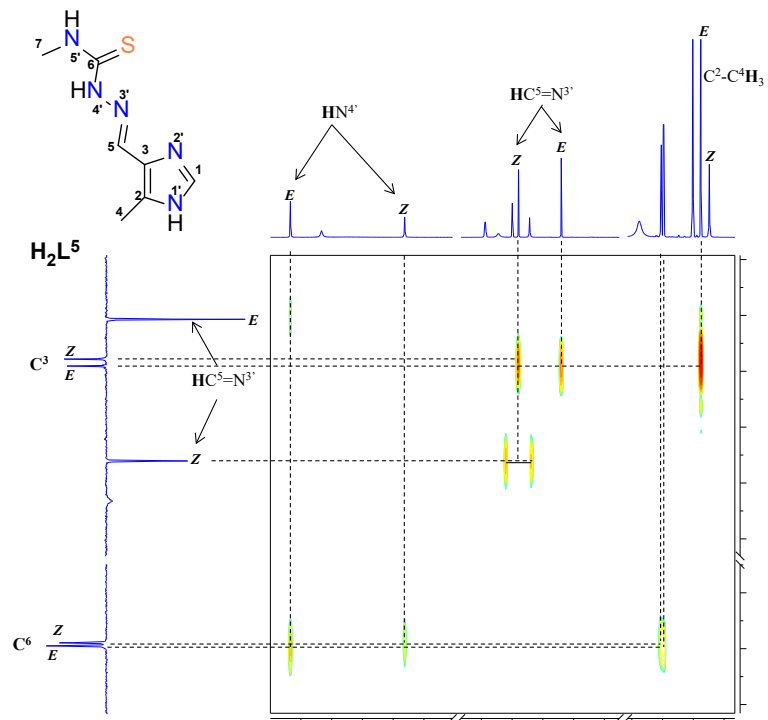

**Fig. S5d**  $^1\text{H}$ ,  $^{13}\text{C}$  HMQC NMR spectrum of **HL<sup>5</sup>** in DMSO- $d_6$ .

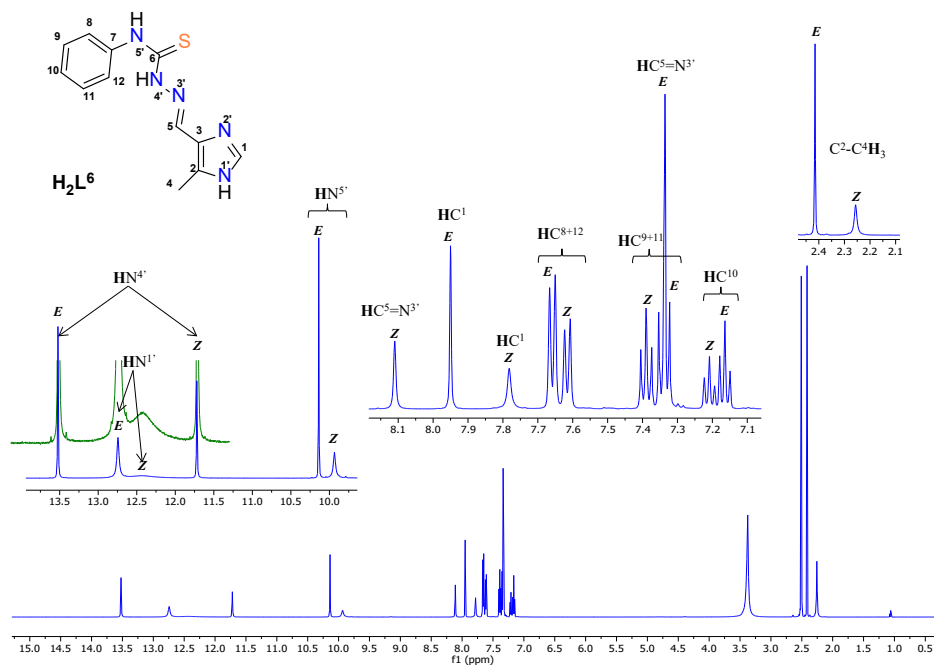

**Fig. S6a**  $^1\text{H}$  NMR (500 MHz) spectra of **HL<sup>6</sup>** in DMSO- $d_6$  (Z:E = 0.7:1).

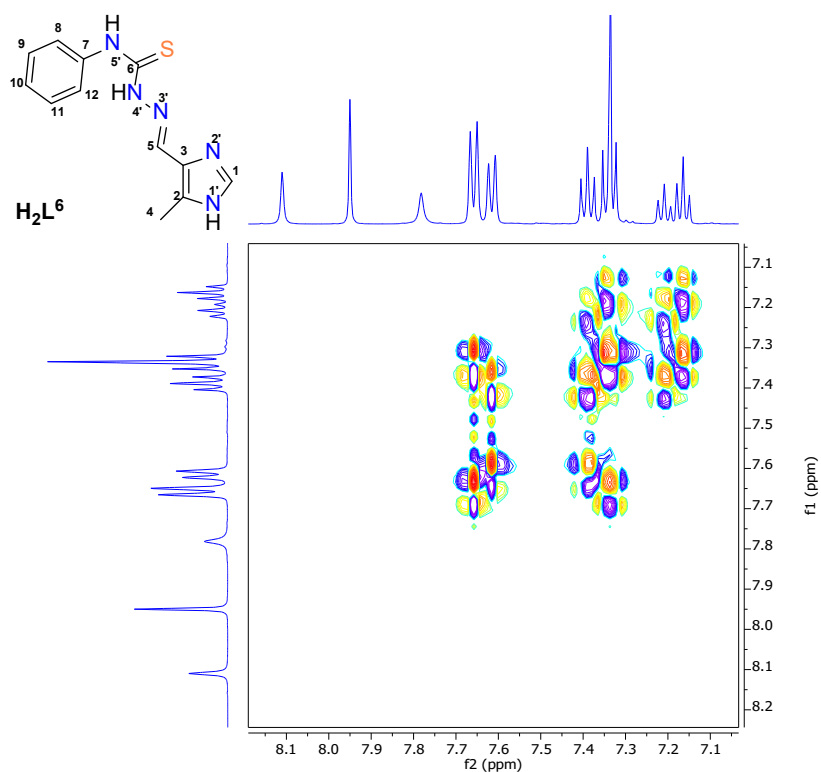

Fig. S6b  $^1\text{H}, ^1\text{H}$  COSY NMR spectrum of **HL<sup>6</sup>** in DMSO- $d_6$ .

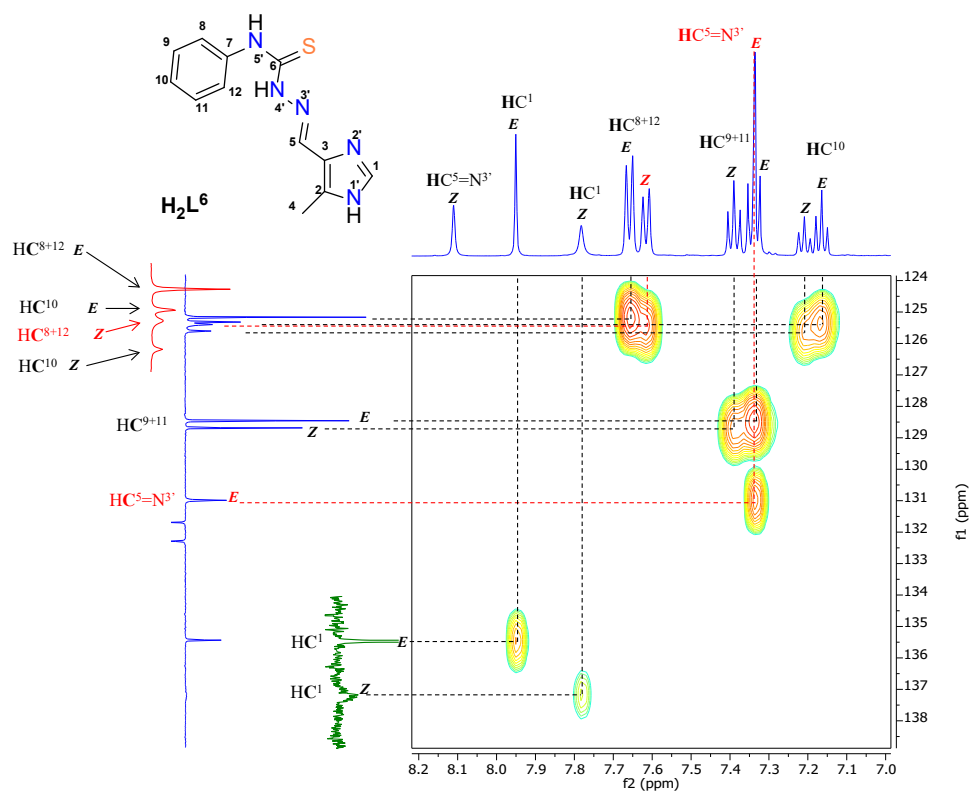

Fig. S6c  $^1\text{H}, ^{13}\text{C}$  HSQC NMR spectrum of **HL<sup>6</sup>** in DMSO- $d_6$ .



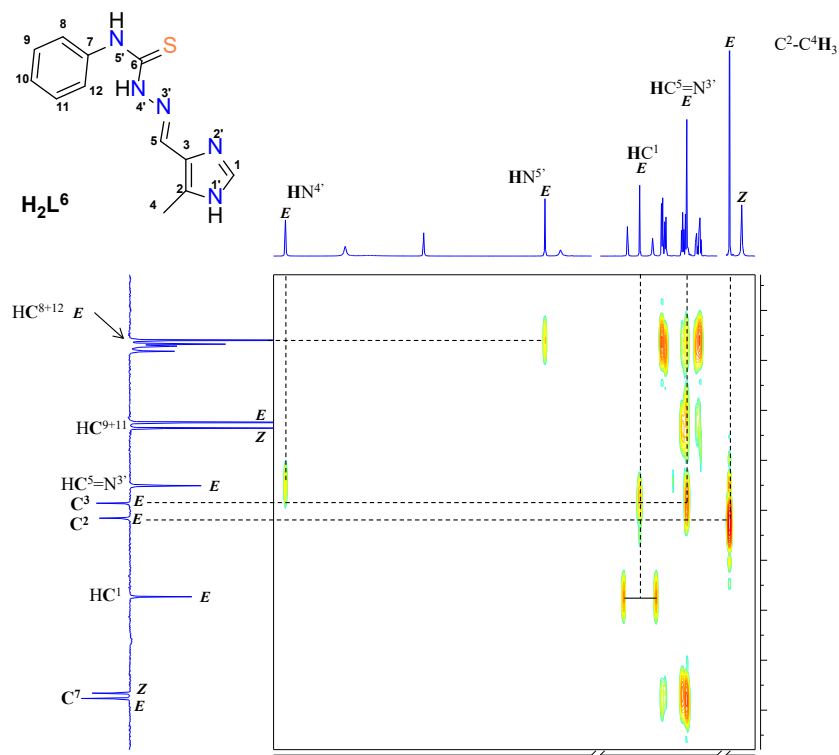

**Fig. S6d**  $^1\text{H}$ ,  $^{13}\text{C}$  HMQC NMR spectrum of **HL<sup>6</sup>** in DMSO- $d_6$ .

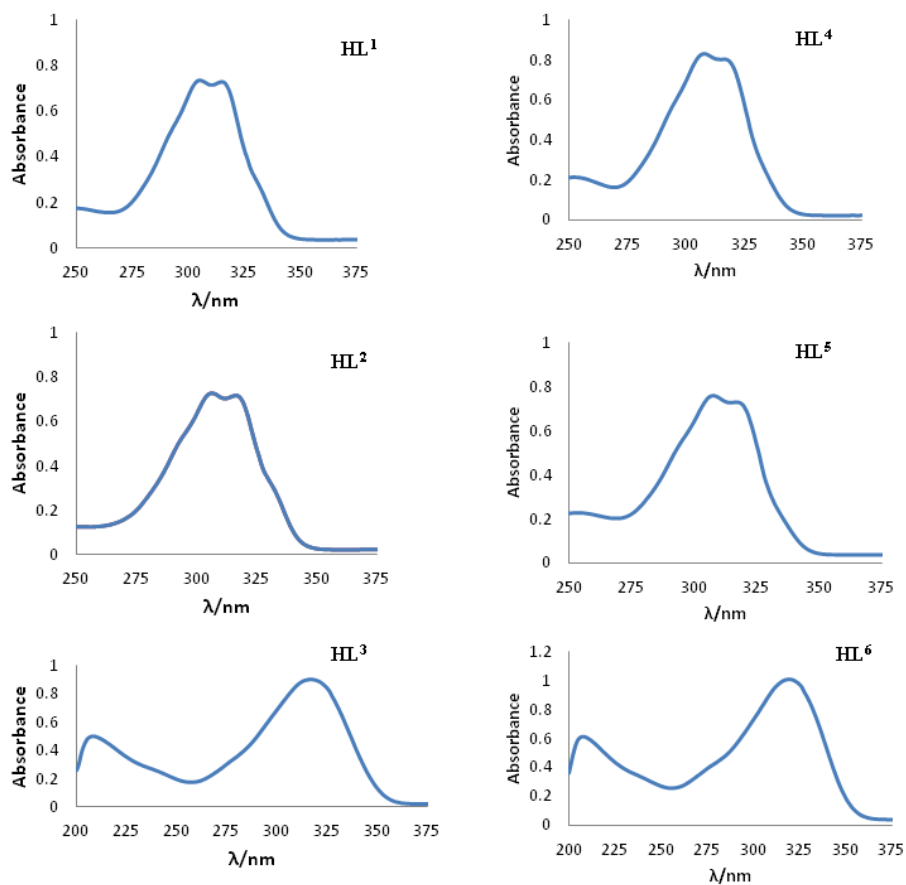

**Fig. S7** UV-vis spectra of **HL<sup>1</sup>–HL<sup>6</sup>**.

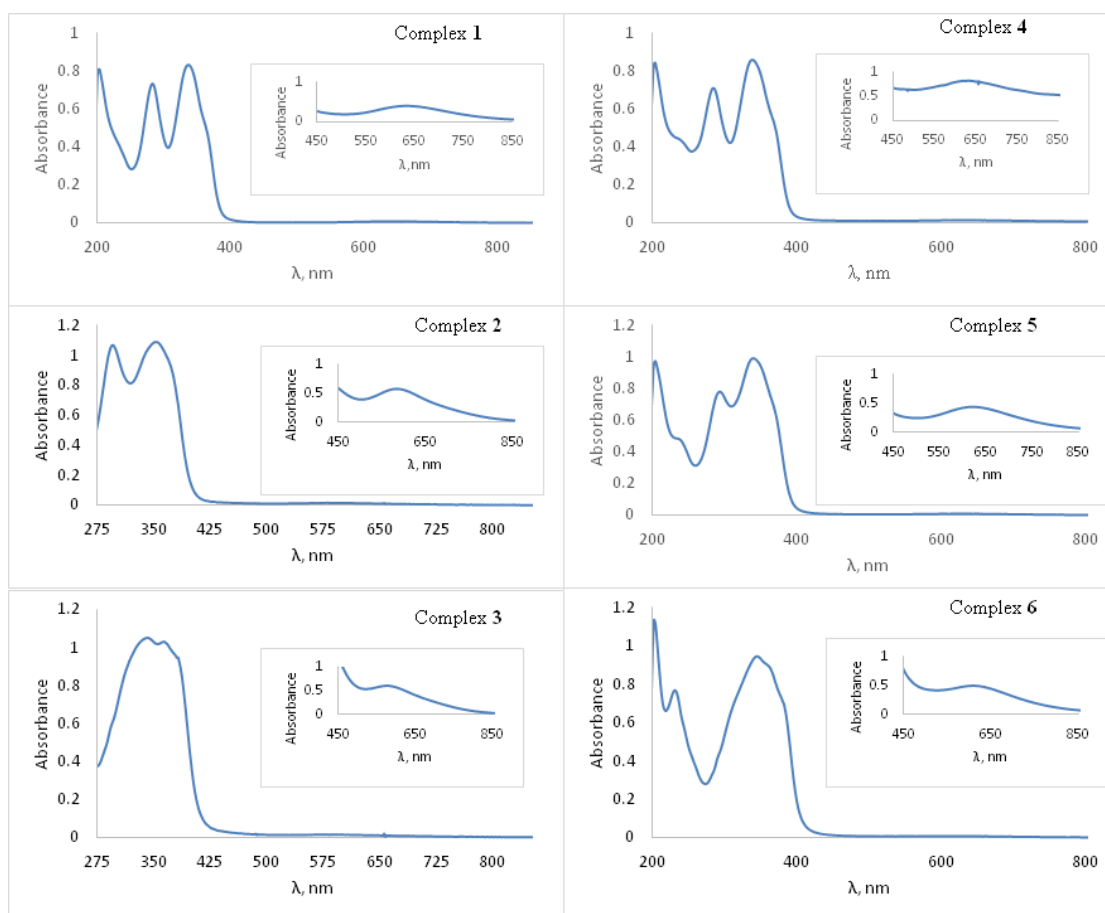

**Fig. S8** UV-vis spectra of 1–6.

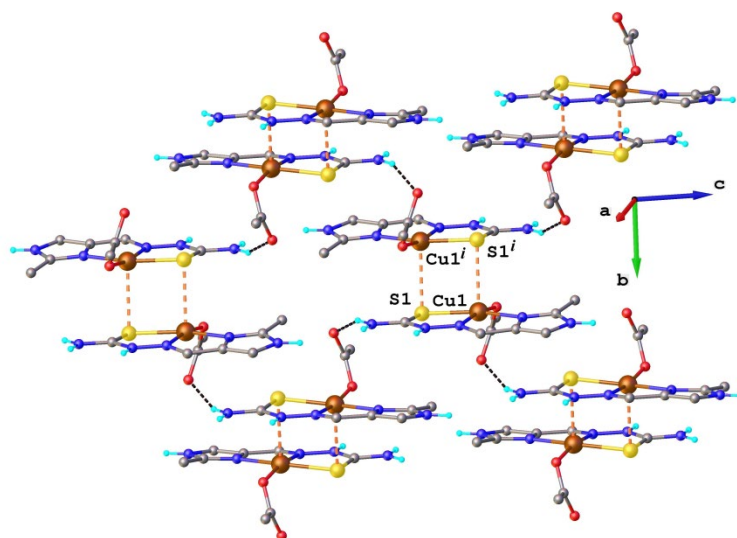

**Fig. S9** View of the part of the crystal structure in 1.

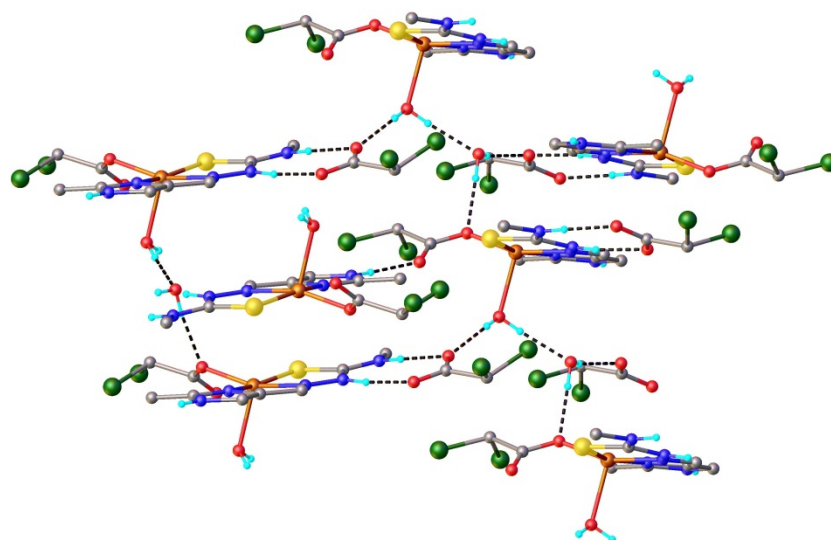

**Fig. S10** View of the part of the crystal structure in 2.

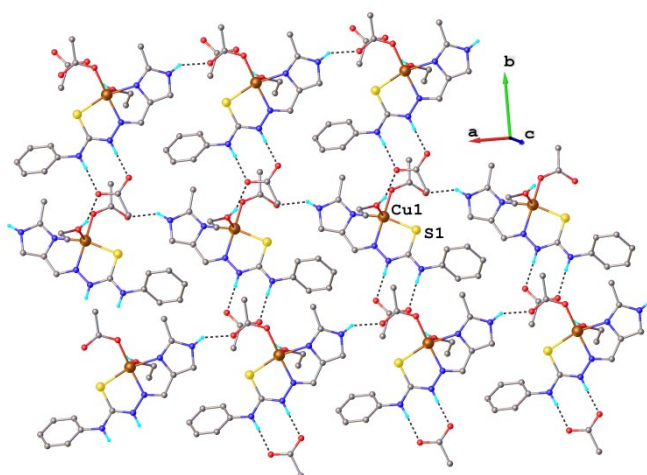

**Fig. S11** View of the part of the crystal structure in 3.

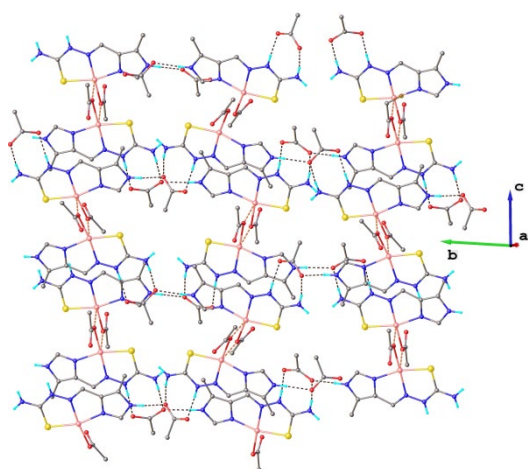

**Fig. S12** View of the part of the crystal structure in 4.

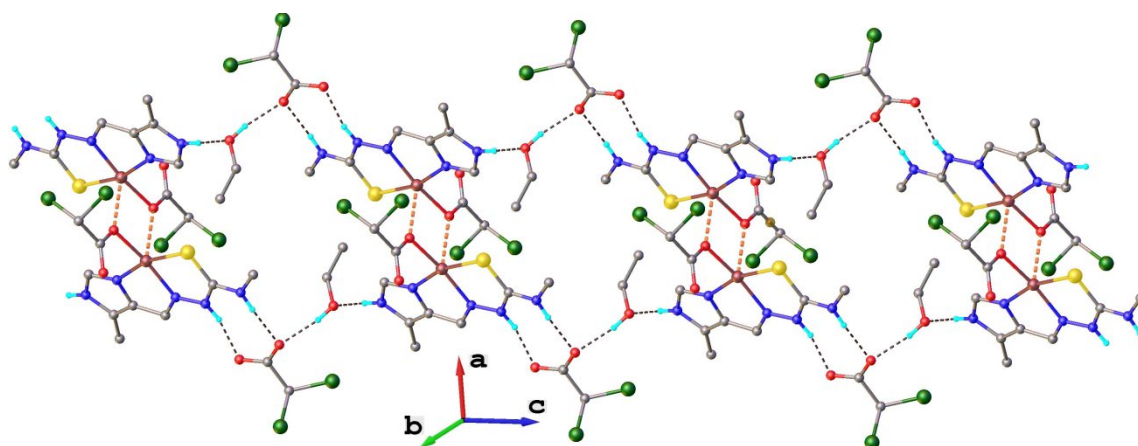

**Fig. S13** H-bonded ribbon in the crystal structure of **5**.

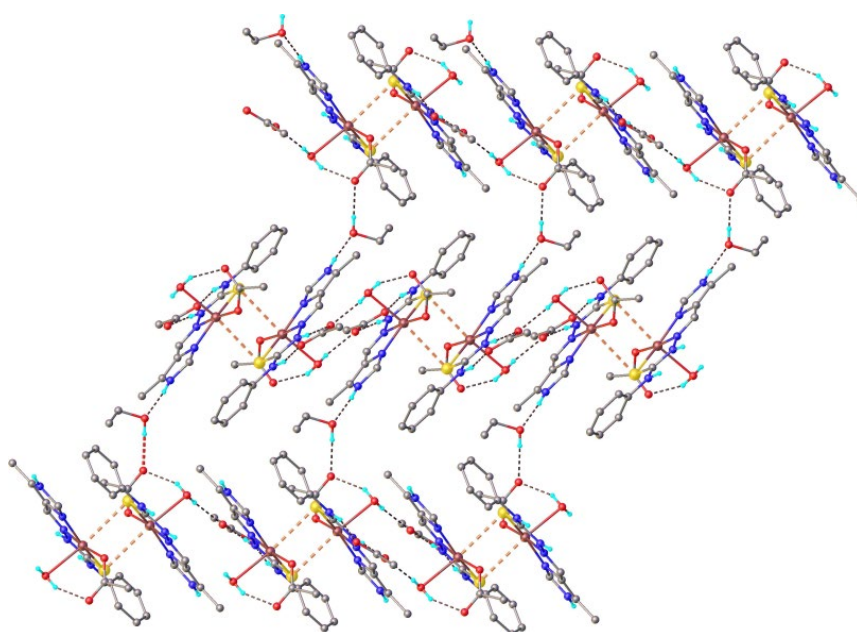

**Fig. S14** View of the part of the crystal structure in **6**.

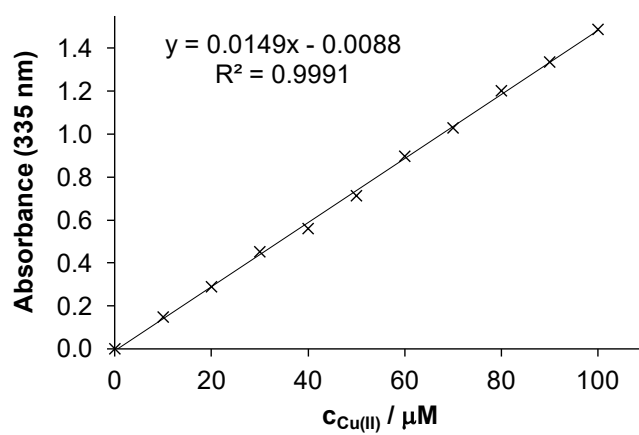

**Fig. S15** Calibration curve for the Cu(II)–H<sub>2</sub>L<sup>1</sup> system at  $\lambda = 335$  nm. ( $c_{\text{ligand}} = 145 \mu\text{M}$ ;  $I = 0.10$  M KCl, pH = 4.07).

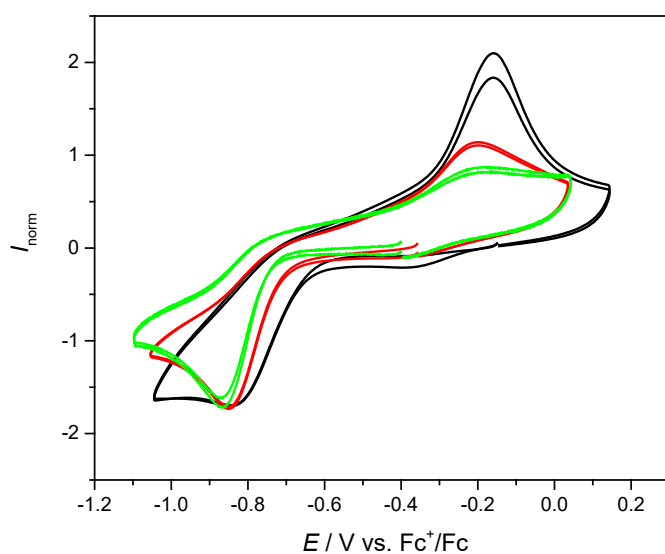

**Fig. S16** The cyclic voltammograms of **1** (black trace), **2** (red trace), **3** (green trace) in DMSO/*n*Bu<sub>4</sub>NPF<sub>6</sub> at scan rate of 100 mV s<sup>-1</sup>.

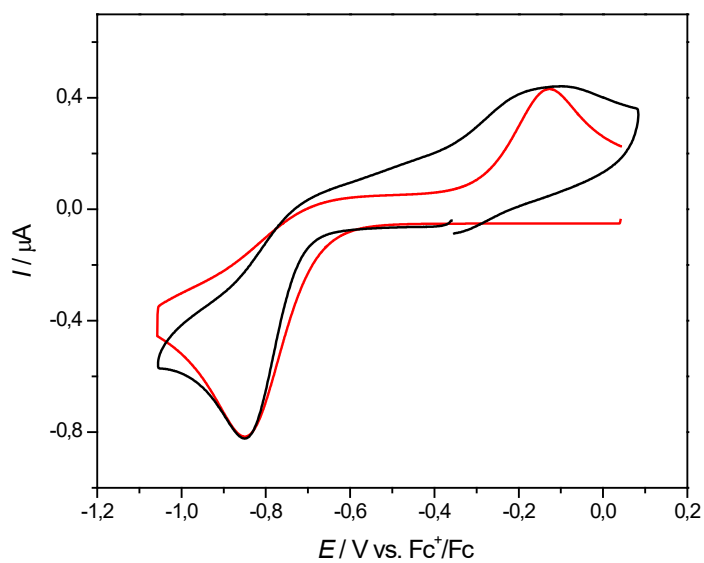

**Fig. S17** Digital simulations of cyclic voltammograms for one-electron reduction of Cu(II) complex **6** (red lines) compared to the experimental traces in DMSO/*n*Bu<sub>4</sub>NPF<sub>6</sub> at scan rate of 100 mV s<sup>-1</sup> (black lines). Formal redox potential  $E^{o'}$  = -0.48 V vs. Fc<sup>+</sup>/Fc,  $k_s$  =  $0.9 \times 10^{-5}$  cm s<sup>-1</sup>,  $\Gamma_{\max}$  =  $3.7 \times 10^{-9}$ .

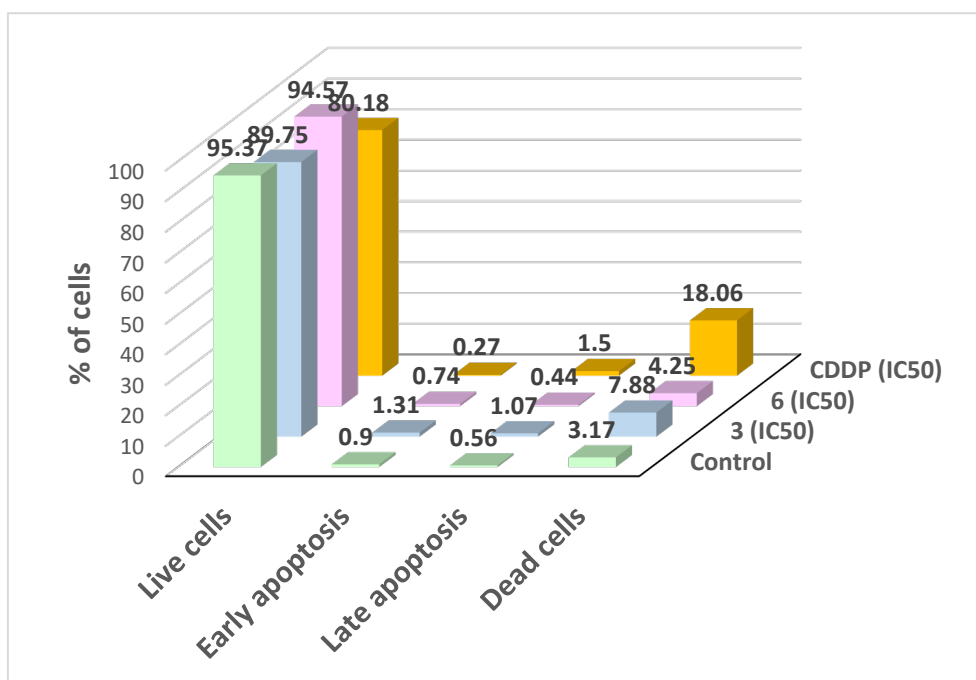

**Fig. S18** Analysis of apoptotic potential of investigated complexes **3** and **6** in comparison to cisplatin (CDDP). The A549 cells were exposed for 24 h to investigated agents and apoptosis was determined by flow cytometry using Annexin V-FITC /PI staining.

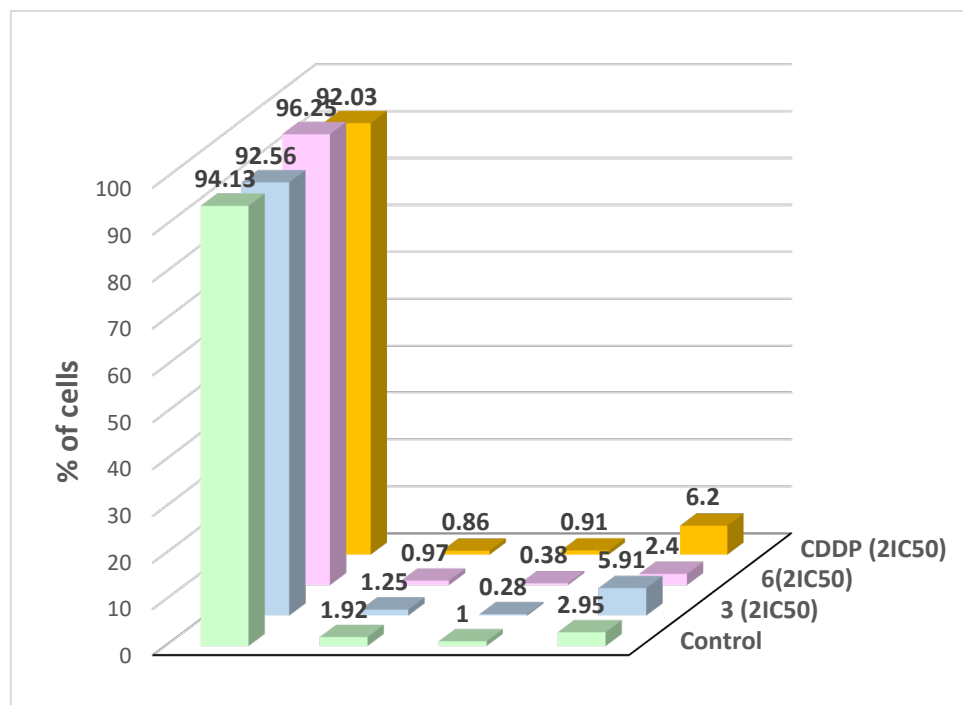

**Fig. S19** Analysis of apoptotic potential of investigated complexes **3** and **6** in comparison to cisplatin. The A549 cells were exposed for 24 h to investigated agents and apoptosis was determined by flow cytometry using annexin V-FITC /PI staining.

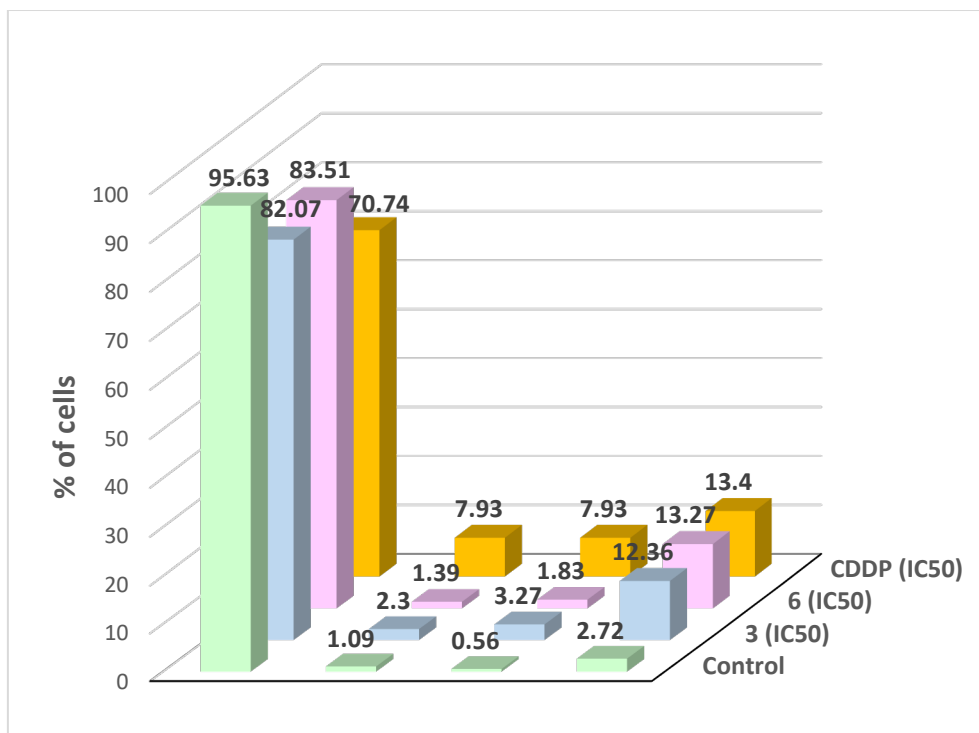

**Fig. S20** Analysis of apoptotic potential of investigated complexes **3** and **6** in comparison to cisplatin. The A549 cells were exposed for 48 h to investigated agents and apoptosis was determined by flow cytometry using annexin V-FITC /PI staining.

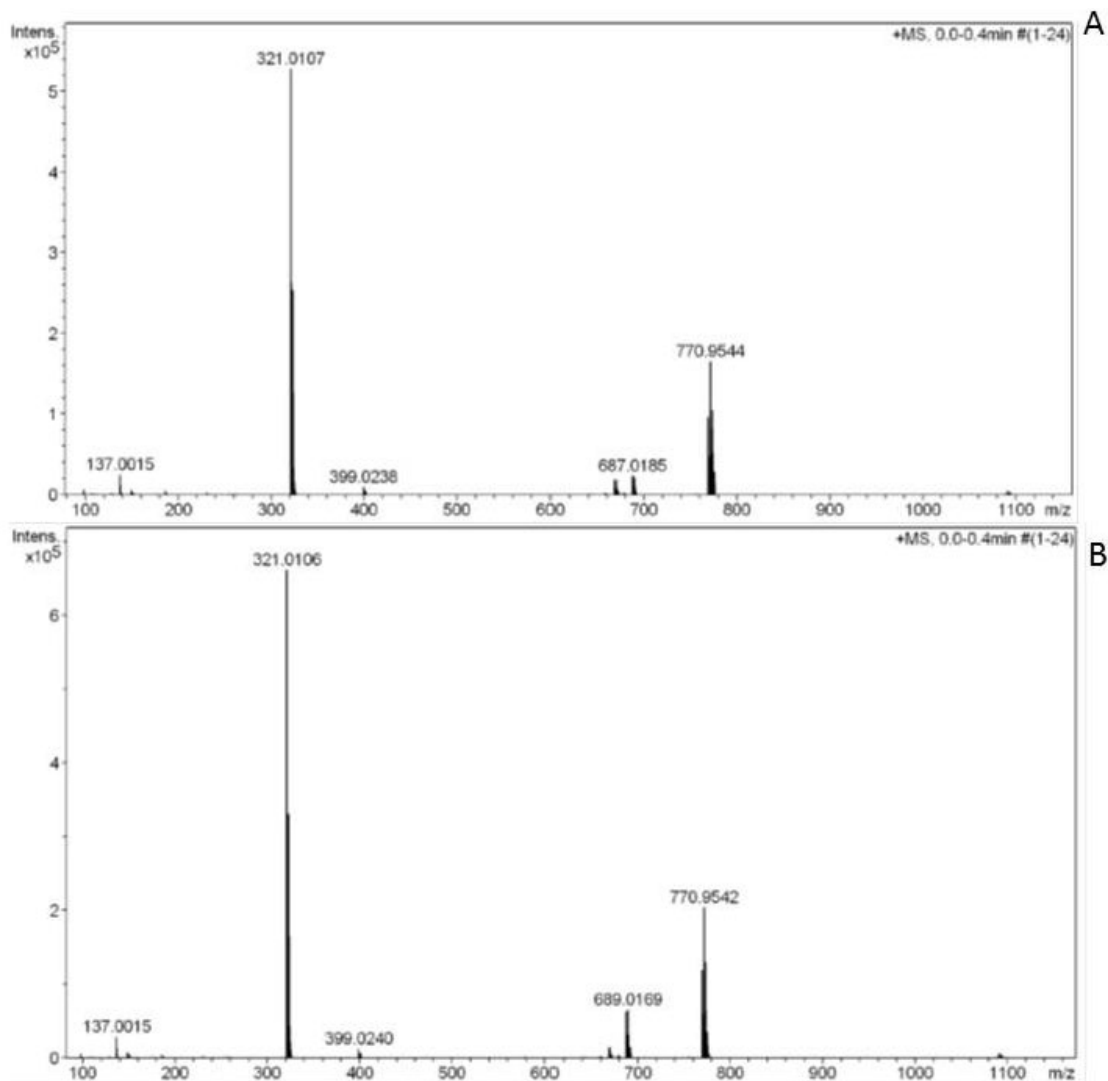

**Fig. S21** ESI mass spectra (in positive mode) of a methanolic solution of **6** with an excess of DMSO measured immediately (A) and 24 h (B) after sample preparation. The  $m/z$  values of 321, 399 and 771 were attributed to  $[\text{Cu}^{\text{II}}(\text{L}^6)]^+$ ,  $[\text{Cu}^{\text{II}}(\text{L}^6)\text{DMSO}]^+$  and  $[\text{Cu}^{\text{II}}_2(\text{L}^6)_2(\text{CHCl}_2\text{CO}_2)]^+$ , respectively.



**Table S1.** Bond distances (Å) and angle (deg.) for **1**.

|       |            |         |            |
|-------|------------|---------|------------|
| C1-C3 | 1.355(3)   | C7-O2   | 1.229(2)   |
| C1-C5 | 1.442(2)   | C8-C11  | 1.779(2)   |
| C1-N1 | 1.396(2)   | C8-C12  | 1.765(2)   |
| C2-C4 | 1.486(2)   | Cu1-N1  | 2.0171(15) |
| C2-N1 | 1.320(2)   | Cu1-N3  | 1.9778(15) |
| C2-N2 | 1.356(3)   | Cu1-O1  | 1.9294(12) |
| C3-N2 | 1.370(2)   | Cu1-S1  | 2.3186(5)  |
| C5-N3 | 1.288(2)   | N3-N4   | 1.367(2)   |
| C6-N4 | 1.337(2)   | C9-C10  | 1.536(3)   |
| C6-N5 | 1.320(2)   | C9-O3   | 1.252(2)   |
| C6-S1 | 1.7335(18) | C9-O4   | 1.248(2)   |
| C7-C8 | 1.536(2)   | C10-C13 | 1.7745(17) |
| C7-O1 | 1.277(2)   | C10-C14 | 1.780(5)   |

|            |            |             |            |
|------------|------------|-------------|------------|
| C3-C1-C5   | 134.27(18) | O1-Cu1-N1   | 100.69(6)  |
| C3-C1-N1   | 109.52(16) | O1-Cu1-N3   | 169.70(6)  |
| N1-C1-C5   | 116.17(16) | O1-Cu1-S1   | 94.48(4)   |
| N1-C2-C4   | 126.26(17) | C1-N1-Cu1   | 111.28(11) |
| N1-C2-N2   | 110.20(16) | C2-N1-C1    | 105.99(15) |
| N2-C2-C4   | 123.52(16) | C2-N1-Cu1   | 142.74(13) |
| C1-C3-N2   | 105.79(17) | C2-N2-C3    | 108.49(15) |
| N3-C5-C1   | 113.72(17) | C5-N3-Cu1   | 118.29(12) |
| N4-C6-S1   | 121.39(13) | C5-N3-N4    | 120.43(16) |
| N5-C6-N4   | 117.36(16) | N4-N3-Cu1   | 121.21(12) |
| N5-C6-S1   | 121.24(14) | C6-N4-N3    | 117.13(15) |
| O1-C7-C8   | 111.68(16) | C7-O1-Cu1   | 119.32(11) |
| O2-C7-C8   | 120.49(17) | C6-S1-Cu1   | 96.31(6)   |
| O2-C7-O1   | 127.74(16) | O3-C9-C10   | 113.05(16) |
| C7-C8-C11  | 106.02(12) | O4-C9-C10   | 119.74(15) |
| C7-C8-C12  | 112.49(14) | O4-C9-O3    | 127.17(17) |
| C12-C8-C11 | 110.36(11) | C9-C10-C13  | 112.33(13) |
| N1-Cu1-S1  | 163.60(4)  | C9-C10-C14  | 107.0(4)   |
| N3-Cu1-N1  | 80.33(6)   | C13-C10-C14 | 106.5(4)   |
| N3-Cu1-S1  | 83.63(4)   |             |            |

**Table S2.** Bond distances (Å) and angle (deg.) for **2**.

|                     |            |         |          |
|---------------------|------------|---------|----------|
| Cu1-S1              | 2.2980(6)  | N3-N4   | 1.367(2) |
| Cu1-O1              | 1.9820(14) | N3-C5   | 1.292(3) |
| Cu1-O1 <sub>w</sub> | 2.1874(14) | N4-C6   | 1.353(3) |
| Cu1-N1              | 2.0404(17) | N5-C6   | 1.319(3) |
| Cu1-N3              | 2.0070(17) | N5-C7   | 1.456(3) |
| C11-C9              | 1.782(2)   | C1-C2   | 1.366(3) |
| C12-C9              | 1.765(2)   | C1-C5   | 1.436(3) |
| S1-C6               | 1.712(2)   | C3-C4   | 1.481(3) |
| O1-C8               | 1.279(2)   | C8-C9   | 1.543(3) |
| O2-C8               | 1.227(2)   | C13-C10 | 1.766(2) |
| N1-C1               | 1.392(3)   | C14-C10 | 1.758(2) |

|       |          |        |          |
|-------|----------|--------|----------|
| N1-C3 | 1.328(3) | O3-C11 | 1.242(3) |
| N2-C2 | 1.368(3) | O4-C11 | 1.251(3) |
| N2-C3 | 1.354(3) | C10C11 | 1.550(3) |

|                         |            |             |            |
|-------------------------|------------|-------------|------------|
| O1-Cu1-S1               | 97.30(4)   | C2-C1-N1    | 109.35(18) |
| O1-Cu1-O1 <sub>w</sub>  | 91.47(6)   | C2-C1-C5    | 133.5(2)   |
| O1-Cu1-N1               | 96.22(6)   | C1-C2-N2    | 105.56(18) |
| O1-Cu1-N3               | 160.86(6)  | N1-C3-N2    | 109.79(18) |
| O1 <sub>w</sub> -Cu1-S1 | 102.54(4)  | N1-C3-C4    | 126.29(19) |
| N1-Cu1-S1               | 160.88(5)  | N2-C3-C4    | 123.85(18) |
| N1-Cu1-O1 <sub>w</sub>  | 90.55(6)   | N3-C5-C1    | 113.62(19) |
| N3-Cu1-S1               | 83.22(5)   | N4-C6-S1    | 121.04(16) |
| N3-Cu1-O1 <sub>w</sub>  | 107.15(6)  | N5-C6-S1    | 122.77(16) |
| N3-Cu1-N1               | 79.59(7)   | N5-C6-N4    | 116.19(19) |
| C6-S1-Cu1               | 97.94(7)   | O1-C8-C9    | 112.72(17) |
| C8-O1-Cu1               | 122.10(13) | O2-C8-O1    | 127.14(19) |
| C1-N1-Cu1               | 111.16(13) | O2-C8-C9    | 120.12(18) |
| C3-N1-Cu1               | 142.35(15) | Cl2-C9-Cl1  | 108.76(12) |
| C3-N1-C1                | 106.28(17) | C8-C9-Cl1   | 110.23(14) |
| C3-N2-C2                | 109.01(17) | C8-C9-Cl2   | 112.85(14) |
| N4-N3-Cu1               | 120.60(12) | Cl4-C10-Cl3 | 111.26(12) |
| C5-N3-Cu1               | 118.29(14) | C11-C10-Cl3 | 112.08(15) |
| C5-N3-N4                | 121.11(17) | C11-C10-Cl4 | 111.76(15) |
| C6-N4-N3                | 116.82(17) | O3-C11-O4   | 126.3(2)   |
| C6-N5-C7                | 123.80(18) | O3-C11-C10  | 117.66(19) |
| N1-C1-C5                | 117.20(18) | O4-C11-C10  | 115.90(18) |

**Table S3.** Bond distances (Å) and angle (deg.) for **3**.

|         |           |         |          |
|---------|-----------|---------|----------|
| Cu1-S1  | 2.2939(9) | N5-C6   | 1.330(4) |
| Cu1-O1  | 1.935(2)  | N5-C7   | 1.431(4) |
| Cu1-O3  | 2.263(2)  | C1-C2   | 1.361(5) |
| Cu1-N1  | 2.028(3)  | C1-C5   | 1.429(5) |
| Cu1-N3  | 1.993(3)  | C3-C4   | 1.483(5) |
| Cl1-C14 | 1.770(3)  | C7-C8   | 1.384(5) |
| Cl2-C14 | 1.774(3)  | C7-C12  | 1.387(5) |
| S1-C6   | 1.713(3)  | C8-C9   | 1.386(5) |
| O1-C13  | 1.260(4)  | C9-C10  | 1.369(6) |
| O2-C13  | 1.264(6)  | C10-C11 | 1.387(6) |
| O2X-C13 | 1.270(6)  | C11-C12 | 1.386(5) |
| O3-C17  | 1.410(5)  | C13-C14 | 1.532(5) |
| N1-C1   | 1.394(4)  | C17-C18 | 1.493(6) |
| N1-C3   | 1.329(4)  | Cl3-C16 | 1.776(4) |
| N2-C2   | 1.372(5)  | Cl4-C16 | 1.758(4) |
| N2-C3   | 1.350(4)  | O4-C15  | 1.244(4) |
| N3-N4   | 1.372(4)  | O5-C15  | 1.262(4) |
| N3-C5   | 1.289(4)  | C15-C16 | 1.536(5) |
| N4-C6   | 1.351(4)  |         |          |

|           |           |          |          |
|-----------|-----------|----------|----------|
| O1-Cu1-S1 | 100.00(7) | N2-C3-C4 | 124.3(3) |
| O1-Cu1-O3 | 97.01(9)  | N3-C5-C1 | 114.0(3) |
| O1-Cu1-N1 | 95.17(10) | N4-C6-S1 | 121.2(2) |

|            |            |             |            |
|------------|------------|-------------|------------|
| O1-Cu1-N3  | 167.46(11) | N5-C6-S1    | 123.2(2)   |
| O3-Cu1-S1  | 96.12(7)   | N5-C6-N4    | 115.5(3)   |
| N1-Cu1-S1  | 163.21(8)  | C8-C7-N5    | 118.2(3)   |
| N1-Cu1-O3  | 89.07(10)  | C8-C7-C12   | 120.5(3)   |
| N3-Cu1-S1  | 83.68(8)   | C12-C7-N5   | 121.1(3)   |
| N3-Cu1-O3  | 94.49(10)  | C7-C8-C9    | 119.6(4)   |
| N3-Cu1-N1  | 80.00(11)  | C10-C9-C8   | 120.4(4)   |
| C6-S1-Cu1  | 97.39(12)  | C9-C10-C11  | 119.9(4)   |
| C13-O1-Cu1 | 129.3(2)   | C12-C11-C10 | 120.5(4)   |
| C17-O3-Cu1 | 131.4(2)   | C11-C12-C7  | 119.0(3)   |
| C1-N1-Cu1  | 110.7(2)   | O1-C13-O2   | 125.0(5)   |
| C3-N1-Cu1  | 140.8(2)   | O1-C13-O2X  | 125.3(5)   |
| C3-N1-C1   | 106.4(3)   | O1-C13-C14  | 113.2(3)   |
| C3-N2-C2   | 109.3(3)   | O2-C13-C14  | 117.8(4)   |
| N4-N3-Cu1  | 120.5(2)   | C11-C14-C12 | 109.07(17) |
| C5-N3-Cu1  | 117.9(2)   | C13-C14-C11 | 112.9(2)   |
| C5-N3-N4   | 121.5(3)   | C13-C14-C12 | 109.4(2)   |
| C6-N4-N3   | 116.7(3)   | O3-C17-C18  | 113.6(4)   |
| C6-N5-C7   | 125.1(3)   | O4-C15-O5   | 126.5(3)   |
| N1-C1-C5   | 116.8(3)   | O4-C15-C16  | 119.1(3)   |
| C2-C1-N1   | 109.4(3)   | O5-C15-C16  | 114.4(3)   |
| C2-C1-C5   | 133.7(3)   | C14-C16-C13 | 109.45(19) |
| C1-C2-N2   | 105.4(3)   | C15-C16-C13 | 107.6(2)   |
| N1-C3-N2   | 109.5(3)   | C15-C16-C14 | 113.2(2)   |
| N1-C3-C4   | 126.2(3)   |             |            |

**Table S4.** Bond distances (Å) and angle (deg.) for **4**.

|           |            |           |            |
|-----------|------------|-----------|------------|
| Cu1A-S1A  | 2.2862(6)  | Cu1B-S1B  | 2.2861(5)  |
| Cu1A-O1A  | 1.9549(13) | Cu1B-O1B  | 1.9586(13) |
| Cu1A-N1A  | 1.9951(16) | Cu1B-N1B  | 1.9921(16) |
| Cu1A-N3A  | 1.9739(16) | Cu1B-N3B  | 1.9740(16) |
| C11A-C8A  | 1.783(2)   | C11B-C8B  | 1.785(2)   |
| C12A-C8A  | 1.779(2)   | C12B-C8B  | 1.775(2)   |
| C13A-C10A | 1.776(2)   | C13B-C10B | 1.771(2)   |
| C14A-C10A | 1.777(2)   | C14B-C10B | 1.779(2)   |
| S1A-C6A   | 1.711(2)   | S1B-C6B   | 1.720(2)   |
| O1A-C7A   | 1.283(2)   | O1B-C7B   | 1.283(2)   |
| O2A-C7A   | 1.227(2)   | O2B-C7B   | 1.228(2)   |
| O3A-C9A   | 1.249(2)   | O3B-C9B   | 1.241(2)   |
| O4A-C9A   | 1.247(2)   | O4B-C9B   | 1.259(3)   |
| N1A-C1A   | 1.394(2)   | N1B-C1B   | 1.392(2)   |
| N1A-C4A   | 1.313(3)   | N1B-C4B   | 1.313(2)   |
| N2A-C2A   | 1.378(3)   | N2B-C2B   | 1.378(3)   |
| N2A-C4A   | 1.350(3)   | N2B-C4B   | 1.350(3)   |
| N3A-N4A   | 1.370(2)   | N3B-N4B   | 1.370(2)   |
| N3A-C5A   | 1.290(3)   | N3B-C5B   | 1.292(2)   |
| N4A-C6A   | 1.341(3)   | N4B-C6B   | 1.336(3)   |
| N5A-C6A   | 1.330(3)   | N5B-C6B   | 1.326(3)   |
| C1A-C2A   | 1.374(3)   | C1B-C2B   | 1.374(3)   |
| C1A-C5A   | 1.436(3)   | C1B-C5B   | 1.445(3)   |
| C2A-C3A   | 1.485(3)   | C2B-C3B   | 1.486(3)   |
| C7A-C8A   | 1.527(3)   | C7B-C8B   | 1.534(3)   |

|          |          |          |          |
|----------|----------|----------|----------|
| C9A-C10A | 1.538(3) | C9B-C10B | 1.542(3) |
|----------|----------|----------|----------|

|                |            |                |            |
|----------------|------------|----------------|------------|
| O1A-Cu1A-S1A   | 94.93(4)   | O1B-Cu1B-S1B   | 102.12(4)  |
| O1A-Cu1A-N1A   | 99.59(6)   | O1B-Cu1B-N1B   | 92.65(6)   |
| O1A-Cu1A-N3A   | 176.95(6)  | O1B-Cu1B-N3B   | 173.00(6)  |
| O1A-C7A-C8A    | 117.42(18) | O1B-C7B-C8B    | 117.86(17) |
| O2A-C7A-O1A    | 125.59(18) | O2B-C7B-O1B    | 125.40(18) |
| O2A-C7A-C8A    | 116.91(17) | O2B-C7B-C8B    | 116.73(17) |
| O3A-C9A-C10A   | 114.00(17) | O3B-C9B-C10B   | 118.43(18) |
| O4A-C9A-O3A    | 127.58(19) | O3B-C9B-O4B    | 127.26(19) |
| O4A-C9A-C10A   | 118.38(17) | O4B-C9B-C10B   | 114.24(17) |
| N1A-Cu1A-S1A   | 164.70(5)  | N1B-Cu1B-S1B   | 163.17(5)  |
| N3A-Cu1A-S1A   | 84.73(5)   | N3B-Cu1B-S1B   | 84.62(5)   |
| N3A-Cu1A-N1A   | 80.52(6)   | N3B-Cu1B-N1B   | 80.41(6)   |
| C6A-S1A-Cu1A   | 96.23(7)   | C6B-S1B-Cu1B   | 96.22(7)   |
| C7A-O1A-Cu1A   | 108.58(12) | C7B-O1B-Cu1B   | 110.22(12) |
| C1A-N1A-Cu1A   | 111.19(12) | C1B-N1B-Cu1B   | 111.78(12) |
| C4A-N1A-Cu1A   | 141.23(14) | C4B-N1B-Cu1B   | 140.84(14) |
| C4A-N1A-C1A    | 106.04(16) | C4B-N1B-C1B    | 106.41(16) |
| C4A-N2A-C2A    | 108.54(16) | C4B-N2B-C2B    | 108.79(16) |
| N4A-N3A-Cu1A   | 120.06(12) | N4B-N3B-Cu1B   | 120.14(12) |
| C5A-N3A-Cu1A   | 118.00(13) | C5B-N3B-Cu1B   | 118.17(13) |
| C5A-N3A-N4A    | 121.90(16) | C5B-N3B-N4B    | 121.69(16) |
| C6A-N4A-N3A    | 116.50(16) | C6B-N4B-N3B    | 116.72(16) |
| C7A-C8A-C11A   | 108.33(15) | C7B-C8B-C11B   | 112.05(13) |
| C7A-C8A-C12A   | 112.33(15) | C7B-C8B-C12B   | 110.13(14) |
| C9A-C10A-C13A  | 111.25(14) | C9B-C10B-C13B  | 112.52(14) |
| C9A-C10A-C14A  | 107.40(14) | C9B-C10B-C14B  | 110.40(15) |
| N1A-C1A-C5A    | 116.34(16) | N1B-C1B-C5B    | 115.78(16) |
| C2A-C1A-N1A    | 109.45(17) | C2B-C1B-N1B    | 109.31(16) |
| C2A-C1A-C5A    | 134.11(18) | C2B-C1B-C5B    | 134.91(18) |
| N2A-C2A-C3A    | 123.64(18) | N2B-C2B-C3B    | 122.49(17) |
| C1A-C2A-N2A    | 104.98(17) | C1B-C2B-N2B    | 104.90(16) |
| C1A-C2A-C3A    | 131.29(18) | C1B-C2B-C3B    | 132.57(18) |
| N1A-C4A-N2A    | 110.99(18) | N1B-C4B-N2B    | 110.59(17) |
| N3A-C5A-C1A    | 113.25(17) | N3B-C5B-C1B    | 113.14(17) |
| N4A-C6A-S1A    | 122.47(15) | N4B-C6B-S1B    | 122.14(15) |
| N5A-C6A-S1A    | 120.94(15) | N5B-C6B-S1B    | 121.10(15) |
| N5A-C6A-N4A    | 116.58(18) | N5B-C6B-N4B    | 116.76(18) |
| C12A-C8A-C11A  | 110.48(12) | C12B-C8B-C11B  | 110.45(11) |
| C13A-C10A-C14A | 110.27(11) | C13B-C10B-C14B | 110.76(11) |

**Table S5.** Bond distances (Å) and angle (deg.) for **5**.

|        |            |       |            |
|--------|------------|-------|------------|
| Cu1-S1 | 2.2903(4)  | N4-C6 | 1.3524(18) |
| Cu1-O2 | 1.9670(9)  | N5-C6 | 1.3196(18) |
| Cu1-N1 | 1.9923(11) | N5-C7 | 1.4554(18) |
| Cu1-N3 | 1.9863(11) | C1-C2 | 1.3690(19) |
| C11-C9 | 1.7873(14) | C1-C5 | 1.4389(19) |
| C12-C9 | 1.7706(14) | C2-C3 | 1.4870(19) |
| S1-C6  | 1.7165(13) | C8-C9 | 1.5371(18) |

|       |            |         |            |
|-------|------------|---------|------------|
| O1-C8 | 1.2274(17) | C13-C11 | 1.7719(14) |
| O2-C8 | 1.2784(17) | C14-C11 | 1.7892(14) |
| N1-C1 | 1.3944(17) | O3-C10  | 1.2506(17) |
| N1-C4 | 1.3114(18) | O4-C10  | 1.2442(17) |
| N2-C2 | 1.3754(18) | C10-C11 | 1.5423(18) |
| N2-C4 | 1.3522(18) | O5-C12  | 1.4293(18) |
| N3-N4 | 1.3666(15) | C12-C13 | 1.500(2)   |
| N3-C5 | 1.2881(18) |         |            |

|           |            |             |            |
|-----------|------------|-------------|------------|
| O2-Cu1-S1 | 95.73(3)   | C1-C2-N2    | 105.07(12) |
| O2-Cu1-N1 | 98.90(4)   | C1-C2-C3    | 131.89(13) |
| O2-Cu1-N3 | 171.15(4)  | N1-C4-N2    | 110.72(12) |
| N1-Cu1-S1 | 164.29(3)  | N3-C5-C1    | 113.21(12) |
| N3-Cu1-S1 | 84.31(3)   | N4-C6-S1    | 121.54(10) |
| N3-Cu1-N1 | 80.35(5)   | N5-C6-S1    | 122.34(10) |
| C6-S1-Cu1 | 96.88(5)   | N5-C6-N4    | 116.12(12) |
| C8-O2-Cu1 | 110.61(8)  | O1-C8-O2    | 126.60(12) |
| C1-N1-Cu1 | 111.77(9)  | O1-C8-C9    | 116.45(12) |
| C4-N1-Cu1 | 141.42(10) | O2-C8-C9    | 116.92(11) |
| C4-N1-C1  | 106.12(11) | C12-C9-C11  | 110.78(7)  |
| C4-N2-C2  | 108.61(11) | C8-C9-C11   | 107.84(9)  |
| N4-N3-Cu1 | 120.29(8)  | C8-C9-C12   | 112.55(9)  |
| C5-N3-Cu1 | 118.11(9)  | O3-C10-C11  | 117.99(12) |
| C5-N3-N4  | 121.57(11) | O4-C10-O3   | 127.73(13) |
| C6-N4-N3  | 116.84(11) | O4-C10-C11  | 114.23(12) |
| C6-N5-C7  | 124.17(12) | C13-C11-C14 | 110.47(7)  |
| N1-C1-C5  | 116.31(11) | C10-C11-C13 | 112.24(9)  |
| C2-C1-N1  | 109.48(12) | C10-C11-C14 | 106.86(9)  |
| C2-C1-C5  | 134.16(12) | O5-C12C13   | 108.55(13) |
| N2-C2-C3  | 122.95(12) |             |            |

**Table S6.** Bond distances (Å) and angle (deg.) for **6**.

|         |            |         |          |
|---------|------------|---------|----------|
| Cu1-S1  | 2.3075(5)  | N5-C7   | 1.425(3) |
| Cu1-O1  | 1.9474(13) | C1-C2   | 1.367(3) |
| Cu1-O1w | 2.4381(14) | C1-C5   | 1.434(3) |
| Cu1-N1  | 2.0055(16) | C2-C3   | 1.492(3) |
| Cu1-N3  | 1.9718(16) | C7-C8   | 1.392(3) |
| C11-C14 | 1.777(2)   | C7-C12  | 1.389(3) |
| C12-C14 | 1.769(2)   | C8-C9   | 1.386(3) |
| S1-C6   | 1.717(2)   | C9-C10  | 1.384(3) |
| O1-C13  | 1.267(2)   | C10-C11 | 1.383(3) |
| O2-C13  | 1.234(2)   | C11-C12 | 1.386(3) |
| N1-C1   | 1.392(3)   | C13-C14 | 1.530(3) |
| N1-C4   | 1.314(3)   | O5-C17  | 1.428(3) |
| N2-C2   | 1.371(3)   | C17-C18 | 1.493(3) |
| N2-C4   | 1.351(3)   | C13-C16 | 1.784(2) |
| N3-N4   | 1.364(2)   | C14-C16 | 1.772(2) |
| N3-C5   | 1.290(3)   | O3-C15  | 1.247(2) |
| N4-C6   | 1.348(3)   | O4-C15  | 1.246(2) |
| N5-C6   | 1.336(3)   | C15-C16 | 1.544(3) |

|            |            |             |            |
|------------|------------|-------------|------------|
| S1-Cu1-O1W | 99.42(4)   | N1-C4-N2    | 110.93(18) |
| O1-Cu1-S1  | 96.12(4)   | N3-C5-C1    | 113.87(17) |
| O1-Cu1-O1W | 94.36(5)   | N4-C6-S1    | 120.65(15) |
| O1-Cu1-N1  | 98.51(6)   | N5-C6-S1    | 125.31(15) |
| O1-Cu1-N3  | 173.62(6)  | N5-C6-N4    | 114.04(17) |
| N1-Cu1-S1  | 162.86(5)  | C8-C7-N5    | 115.92(18) |
| N1-Cu1-O1W | 88.34(6)   | C12-C7-N5   | 123.88(18) |
| N3-Cu1-S1  | 83.62(5)   | C12-C7-C8   | 120.09(19) |
| N3-Cu1-O1W | 91.96(6)   | C9-C8-C7    | 119.7(2)   |
| N3-Cu1-N1  | 80.85(7)   | C10-C9-C8   | 120.4(2)   |
| C6-S1-Cu1  | 97.11(7)   | C11-C10-C9  | 119.6(2)   |
| C13-O1-Cu1 | 123.55(12) | C10-C11-C12 | 120.7(2)   |
| C1-N1-Cu1  | 110.92(12) | C11-C12-C7  | 119.5(2)   |
| C4-N1-Cu1  | 143.49(14) | O1-C13-C14  | 112.25(17) |
| C4-N1-C1   | 105.54(16) | O2-C13-O1   | 128.11(18) |
| C4-N2-C2   | 108.63(17) | O2-C13-C14  | 119.61(17) |
| N4-N3-Cu1  | 120.92(12) | C12-C14-C11 | 109.48(11) |
| C5-N3-Cu1  | 117.67(13) | C13-C14-C11 | 106.86(14) |
| C5-N3-N4   | 121.39(16) | C13-C14-C12 | 112.46(15) |
| C6-N4-N3   | 117.31(16) | O5-C17-C18  | 112.65(19) |
| C6-N5-C7   | 129.36(17) | O3-C15-C16  | 119.08(18) |
| N1-C1-C5   | 116.59(17) | O4-C15-O3   | 126.71(19) |
| C2-C1-N1   | 109.98(17) | O4-C15-C16  | 114.21(17) |
| C2-C1-C5   | 133.43(19) | C14-C16-C13 | 109.94(11) |
| N2-C2-C3   | 123.39(18) | C15-C16-C13 | 108.41(14) |
| C1-C2-N2   | 104.92(17) | C15-C16-C14 | 113.25(14) |
| C1-C2-C3   | 131.65(19) |             |            |

**Table S7.** Bond distances (Å) and angle (deg.) for Cu(II) atom.

|              | <b>3</b>  | <b>6</b>   |
|--------------|-----------|------------|
| Cu1-S1       | 2.2939(9) | 2.3075(5)  |
| Cu1-O1       | 1.935(2)  | 1.9474(13) |
| Cu1-O3(O1w)* | 2.263(2)  | 2.4381(14) |
| Cu1-N1       | 2.028(3)  | 2.0055(16) |
| Cu1-N3       | 1.993(3)  | 1.9718(16) |

|                 |            |           |
|-----------------|------------|-----------|
| O1-Cu1-S1       | 100.00(7)  | 96.12(4)  |
| O1-Cu1-O3(O1w)* | 97.01(9)   | 94.36(5)  |
| O1-Cu1-N1       | 95.17(10)  | 98.51(6)  |
| O1-Cu1-N3       | 167.46(11) | 173.62(6) |
| O3-Cu1-S1       | 96.12(7)   | 99.42(4)  |
| N1-Cu1-S1       | 163.21(8)  | 162.86(5) |
| N1-Cu1-O3       | 89.07(10)  | 88.34(6)  |
| N3-Cu1-S1       | 83.68(8)   | 83.62(5)  |
| N3-Cu1-O3       | 94.49(10)  | 91.96(6)  |
| N3-Cu1-N1       | 80.00(11)  | 80.85(7)  |

\*complex 6

|         | 1          | 2         | 4          |            | 5          |
|---------|------------|-----------|------------|------------|------------|
|         |            |           | Molecule A | Molecule B |            |
| Cu1-N1  | 2.0171(15) | 2.022(2)  | 1.9951(16) | 1.9921(16) | 1.9923(11) |
| Cu1-N3  | 1.9778(15) | 1.978(2)  | 1.9739(16) | 1.9740(16) | 1.9863(11) |
| Cu1-O1  | 1.9294(12) | -         | 1.9549(13) | 1.9586(13) | 1.9670(9)  |
| Cu1-S1  | 2.3186(5)  | 2.2877(7) | 2.2862(6)  | 2.2861(5)  | 2.2903(4)  |
| Cu1-Cl1 | -          | 2.2244(7) | -          | -          | -          |

|            | 1         | 2         | 4          |            | 5         |
|------------|-----------|-----------|------------|------------|-----------|
|            |           |           | Molecule A | Molecule B |           |
| O1-Cu1-N1  | 100.69(6) | -         | 99.59(6)   | 92.65(6)   | 98.90(4)  |
| O1-Cu1-N3  | 169.70(6) | -         | 176.95(6)  | 173.00(6)  | 171.15(4) |
| O1-Cu1-S1  | 94.48(4)  | -         | 94.93(4)   | 102.12(4)  | 95.73(3)  |
| N1-Cu1-S1  | 163.60(4) | 161.55(6) | 164.70(5)  | 163.17(5)  | 164.29(3) |
| N3-Cu1-N1  | 80.33(6)  | 80.56(8)  | 80.52(6)   | 80.41(6)   | 80.35(5)  |
| N3-Cu1-S1  | 83.63(4)  | 83.81(6)  | 84.73(5)   | 84.62(5)   | 84.31(3)  |
| Cl1-Cu1-S1 | -         | 93.89(2)  | -          | -          | -         |
| N1-Cu1-Cl1 | -         | 102.09(6) | -          | -          | -         |
| N3-Cu1-Cl1 | -         | 176.74(6) | -          | -          | -         |

**Table S8.** Formal redox potential, heterogeneous rate constant and surface excess values for all studied complexes obtained from simulation.

|          | $E / V$ vs. $Fc^+/Fc$ | $E / V$ vs. NHE | $k_s / 10^{-5} \text{ cm s}^{-1}$ | $\Gamma_{\text{max}} / 10^{-8}$ |
|----------|-----------------------|-----------------|-----------------------------------|---------------------------------|
| <b>1</b> | -0.52                 | 0.12            | 2.3                               | 8.80                            |
| <b>2</b> | -0.52                 | 0.12            | 2.0                               | 1.30                            |
| <b>3</b> | -0.50                 | 0.14            | 1.4                               | 0.25                            |
| <b>4</b> | -0.51                 | 0.13            | 2.9                               | 9.00                            |
| <b>5</b> | -0.51                 | 0.13            | 5.0                               | 17.00                           |
| <b>6</b> | -0.48                 | 0.16            | 0.9                               | 0.37                            |
